# 1                    **The WT1-like transcription factor**

## 2                    **Klumpfuss maintains lineage commitment**

### 3                    **in the intestine**

4

5

6

7

8

9

10

11

12    Jerome Korzelius<sup>1§</sup>, Tal Ronnen-Oron<sup>2</sup>, Maik Baldauf<sup>1</sup>, Elke Meier<sup>1</sup>, Pedro

13    Sousa-Victor<sup>2</sup>, and Heinrich Jasper<sup>1,2,3§</sup>

14

15    1. Leibniz Institute on Aging – Fritz Lipmann Institute (FLI), Jena, Germany

16    2. Buck Institute for Research on Aging, 8001 Redwood Boulevard, Novato,

17    CA 94945-1400, USA

18    3. Immunology Discovery, Genentech, Inc., 1 DNA Way, South San

19    Francisco, CA 94080, USA

20

21    § (Co-)Corresponding author

22    Jerome.Korzelius@leibniz-fli.de

jasper.heinrich@gene.com

## 23 **Abstract**

24

25 Stem cell (SC) lineages in barrier epithelia exhibit a high degree of plasticity.  
 26 Mechanisms that govern the precise specification of SC daughter cells during  
 27 regenerative episodes are therefore critical to maintain homeostasis. One  
 28 such common mechanism is the transient activation of the Notch (N) signaling  
 29 pathway. N controls the choice between absorptive and entero-endocrine cell  
 30 fates in both the mammalian small intestine and the *Drosophila* midgut, yet  
 31 how precisely N signaling promotes lineage restriction in progenitor cells  
 32 remains unclear. Here, we describe a role for the WT1-like transcription factor  
 33 Klumpfuss (Klu) in restricting the fate of *Drosophila* enteroblasts (EBs)  
 34 downstream of N activation. Klu is transiently induced in Notch-positive EBs  
 35 and its transient activity restricts cell fate towards the enterocyte (EC) lineage.  
 36 Transcriptomics and DamID profiling show that Klu suppresses  
 37 enteroendocrine (EE) cell fates by repressing E(Spl)m8-HLH and Phyllopod,  
 38 both negative regulators of the proneural gene Scute, which is essential for  
 39 EE differentiation. At the same time, Klu suppresses cell cycle genes,  
 40 committing EBs to differentiation. Klu-mediated repression of its own  
 41 transcription further sets up a negative feedback loop that ensures temporal  
 42 restriction of Klu-mediated gene regulation, and is essential for subsequent  
 43 differentiation of ECs. Our findings define a transient cell state in which EC  
 44 lineage restriction is cemented, and establish a hierarchy of transcriptional  
 45 programs critical in executing a differentiation program downstream of initial  
 46 induction events governed by N signaling.

47

## 48    **Introduction**

49    In many tissues, somatic SCs respond to tissue injury by increasing their  
 50    proliferative potential and producing new differentiating cell progeny. To  
 51    maintain homeostasis during such periods of regeneration, cell specification  
 52    and differentiation need to be precisely coordinated within a dynamic  
 53    environment. Studies in the mammalian intestine have demonstrated a  
 54    surprising plasticity in such specification events, showing that even  
 55    differentiated cells can revert into a stem cell state in conditions in which  
 56    tissue homeostasis is perturbed <sup>1,2</sup>. These findings highlight the critical role of  
 57    gene regulatory networks in establishing and maintaining differentiated and  
 58    committed cell states in homeostatic conditions.

59    The *Drosophila* midgut is an excellent model to study lineage differentiation of  
 60    adult stem cells both in homeostasis as well as during regeneration and  
 61    aging. The *Drosophila* midgut is maintained by intestinal stem cell (ISCs),  
 62    which can generate differentiated enterocytes (EC) or entero-endocrine (EE)  
 63    cells <sup>3,4</sup>. Upon injury or infection, ISC proliferation is dramatically increased in  
 64    response to mitogenic signals from damaged enterocytes <sup>5-7</sup>. Mis-regulation  
 65    of cell specification and differentiation in this lineage can lead to significant  
 66    dysfunction, as evidenced in aging intestines, where disruption of normal N  
 67    signaling due to elevated Jun-N-terminal Kinase (JNK) signaling leads to an  
 68    accumulation of mis-differentiated cells that contribute to epithelial dysplasia  
 69    and barrier dysfunction <sup>8,9</sup>.

70

71    Notch signaling plays a central role in both ISC proliferation and lineage  
 72    differentiation. ISCs produce the Notch-ligand Delta and activate Notch in the

EB daughter cell. Levels of Delta vary markedly between ISCs in the homeostatic intestine. These differences have been proposed to underlie the decision between EC and EE differentiation in a specific ISC lineage<sup>10</sup>. It has been proposed that higher N activity is associated with differentiation into the EC fate, while lower N activity promotes EE differentiation<sup>10,11</sup>. Loss of N in ISC lineages leads to the formation of tumors that consist of highly Delta-expressing ISCs and of Prospero (Pros)-expressing EEs<sup>10,12,13</sup>. These tumors are likely a consequence of impaired EB differentiation, resulting in an increased frequency of symmetric divisions, as well as of differentiation of a subset of EBs into EE, suggesting that EE differentiation is a default fate in the lineage when N signaling activity is reduced.

Interestingly, recent work has shown that lineage specification in ISC daughter cells is likely more complex than a simple model in which EB fates are determined stochastically or by ‘lateral-inhibition’ – like N-mediated mechanisms. It has been shown that pre-determined ISCs exist that express the EE marker Prospero and generate daughter cells that differentiate into EEs<sup>14,15</sup>.

The exact cell state in which the decision between EE and EC fates is cemented, however, remains unclear. A transient specification step has been identified in EE differentiation, in which cells transiently express Scute, a transcription factor that negatively regulates N responsive genes such as E(Spl)m8, as well as its own expression<sup>16</sup>. Furthermore, EBs have been shown to remain in a transient state for a prolonged period of time before differentiating into an EC fate<sup>17</sup>. Mechanisms that regulate and maintain this transient state remain unclear.



98

99 Here we describe a role for the Wilms' Tumour 1 (WT1) – like transcription  
100 factor Klumpfuss (Klu) in lineage commitment during EC differentiation in the  
101 adult fly intestine. In transcriptome studies of FACS sorted ISC and EBs, we  
102 found Klu to be expressed in an Esg-dependent manner specifically in EBs.  
103 Klu is critical for leg and bristle development, as well as for lineage  
104 differentiation of Type II neuroblast stem cells<sup>18,19</sup>. Klu is related to the  
105 mammalian tumor suppressor gene Wilms' Tumour 1 (WT1), and its  
106 overexpression in neuroblast stem cells leads to tumorous overgrowths that  
107 can grow autonomously when transplanted in the abdomen of flies<sup>20,21</sup>. In the  
108 intestine, we find that loss of Klu leads to aberrant entero-endocrine  
109 differentiation of EB cells, whereas ectopic activation of Klu results in a failure  
110 to differentiate. Transcriptomics and DNA-binding studies reveal that Klu  
111 controls EE differentiation by repressing genes involved in Notch signaling, as  
112 well as by indirectly controlling the levels of the Achaete-Scute complex  
113 members *asense* and *scute*. Klu further represses its own expression,  
114 defining a transient state of EBs in which specification into ECs is cemented  
115 by precise temporal regulation of N signaling. We propose that the transient  
116 expression of Klu 'locks in' the EC fate in EBs, preventing ectopic proneural  
117 gene activation and thus ensuring lineage commitment into the EC fate.

118

## 119 Results

### 120 The transcription factor Klu is expressed in the enteroblast precursor 121 cells

122 We identified Klumpfuss (Klu) transcripts to be specifically enriched in  
123 transcriptomes isolated from sorted progenitor cells<sup>22</sup> and to be significantly  
124 downregulated upon loss of the stem and progenitor specific transcription  
125 factor Escargot (Esg)<sup>23</sup>. To confirm and better characterize *klu* expression in  
126 the *Drosophila* posterior midgut, we used a *klu-Gal4*, *UAS-GFP* reporter line  
127 that reflects Klu expression in the wing and eye discs of wandering 3rd instar  
128 larvae<sup>18,24</sup>. In the midgut, GFP expression was seen in the larger cells of the  
129 stem-progenitor nests (ISC+EB). These cells resemble EBs based on both  
130 nuclear and cellular size (Figure 1A arrowheads). To confirm their identity, we  
131 combined the Klu reporter line with the Notch activity reporter *Su(H)GBE-lacZ*,  
132 which is exclusively activated in EBs, but not in ISCs<sup>10</sup>. In addition, we used  
133 *Delta-lacZ* (*DI-lacZ*) as a marker for ISCs. The expression of *klu-Gal4*, *UAS-*  
134 *GFP* overlapped almost exclusively with the EB-specific *Su(H)GBE-lacZ*  
135 reporter. In contrast, ISC-specific Delta-lacZ staining was mostly found in  
136 small, diploid cells neighboring the GFP-positive cells (Figure 1 B, C,  
137 quantification in D, E).

138 Lineage tracing experiments have previously shown that Notch-positive EB  
139 precursor cells exclusively give rise to enterocytes, whereas Delta-positive  
140 ISCs can give rise to clones with both ECs and EEs<sup>14,15</sup>. To trace the fate of  
141 Klu-expressing cells, we crossed the *klu-Gal4* enhancer-trap line to a Actin  
142 promoter-driven FlipOut lineage tracing cassette (*UAS-GFP*, *tub-*  
143 *Gal80ts;UAS-Flp*, *Act>STOP>Gal4*). Upon temperature shift, the UAS-Flp-

144 inducible *Act>STOP>Gal4* will be activated, marking all cells that express Klu  
145 as well as all differentiated progeny from these cells. As expected, *DI-Gal4*  
146 expressing ISCs give rise to both ECs (visible as large GFP-positive cells with  
147 a large, polyploid nucleus) as well as EEs, marked by expression of the  
148 transcription factor Prospero (Pros) (Figure 1F, arrows). In contrast, Notch-  
149 positive EBs (*Su(H)GBE-Gal4*) only gave rise to ECs, but not EEs (Figure 1G,  
150 arrowheads). Similar to Notch-positive EBs, *klu-Gal4*-traced cells gave rise  
151 exclusively to ECs, but not EEs (Figure 1H). We conclude that Klu is  
152 specifically expressed in the EC-generating EBs in the *Drosophila* midgut.

153

#### 154 **Klu loss of function leads to excess EE differentiation**

155 To determine the role of Klu in the specification and/or differentiation of cells  
156 in the ISC lineage, we first inhibited Klu function using RNAi. We used the  
157 TARGET-system to express UAS-driven RNAi constructs in specific lineages  
158 in a temperature-dependent manner<sup>25</sup>. We used the *esg-Gal4<sup>ts</sup>* driver to  
159 express Klu RNAi in ISCs and EBs and the *Su(H)GBE-Gal4<sup>ts</sup>* driver that drives  
160 expression in EBs only. In both conditions, knockdown of Klu lead to an  
161 increase of EEs in the posterior midgut (Figure 2A-D, quantification in E). To  
162 confirm the EE differentiation phenotype, we used Mosaic analysis with a  
163 repressible cell marker (MARCM)<sup>26</sup> to generate marked lineages  
164 homozygous for a null allele of Klu, *klu<sup>R51</sup>*<sup>18</sup> and traced the fate of *klu<sup>R51</sup>*  
165 mutant cells. Quantification showed that loss of Klu leads to more EE  
166 cells/clone (Figure 2F-I). Interestingly, the GFP-negative tissue also contained  
167 more EEs in *klu<sup>R51</sup>* MARCM animals than in the control animals (*FRT2A*,  
168 Figure 2F, compare with 2G). This is likely due to the fact that in this

169 genotype, the GFP-negative tissue is heterozygous for the *klu*<sup>R51</sup> null allele. In  
 170 addition, we generated stem cell clones expressing *klu*<sup>RNAi</sup> using the *escargot*  
 171 promoter-driven FlipOut system (*esg-F/O*). Enterocyte differentiation still  
 172 occurred in *esg-F/O* > *klu*<sup>RNAi</sup> clones based on nuclear size of cells within the  
 173 clones and staining for the enterocyte marker Pdm1<sup>23,27</sup> (Figure S1).  
 174 In summary, these results indicate that loss of Klu function alters the EE-to-  
 175 EC ratio, but does not impair EC differentiation.

176

## 177 **Ectopic Klu expression inhibits stem cell differentiation and impairs**

### 178 **Delta-Notch signaling**

179 We hypothesized that constitutive Klu expression would impair EE  
 180 differentiation. To test this, we used the *esg-F/O* system to express full-length  
 181 Klu in ISC-derived clones. Wild-type *esg-F/O* clones take up most of the  
 182 posterior midgut 2 weeks after induction, containing a mixture of ECs and EEs  
 183 (Figure 3A). In contrast, clones expressing full-length Klu did not exhibit any  
 184 hallmarks of differentiation into either EEs or ECs, but contained only a few  
 185 small, round cells (Figure 3B). Klu is thought to act mainly as a repressor of  
 186 transcription, based on studies in neuroblast stem cells and in sensory organ  
 187 precursor (SOP) cells in the developing wing<sup>20,24,28</sup>. To ask whether this  
 188 repressor function of Klu would elicit the phenotypes observed, we expressed  
 189 the zinc-finger DNA-binding domain of Klu fused to either a VP16 activation  
 190 domain (Klu-VP16) or fused to the repressor domain from Engrailed (Klu-  
 191 ERD)<sup>28</sup>. Whereas differentiation still occurred in clones expressing the  
 192 activating Klu-VP16, differentiation was significantly impaired in clones  
 193 expressing the repressing Klu-ERD, confirming that transcriptional repression

194 of genes regulated by Klu is sufficient to impair differentiation (Figure 3C-D,  
195 quantification in E).

196 Together with the temporally restricted endogenous expression pattern of Klu,  
197 these data indicate that Klu is acting in early EBs to restrict EE differentiation,  
198 but that it has to be downregulated and that its sustained expression keeps  
199 cells in an undifferentiated state. To specify this state, we combined *UAS-Klu*  
200 with the ISC-marker *DI-lacZ* and the EB-marker *Su(H)GBE-lacZ*. Interestingly,  
201 *esg-F/O* clones expressing *UAS-klu* did not stain positive for either *DI-lacZ* or  
202 *Su(H)GBE-lacZ*. This suggests that Klu expression promotes an exit from the  
203 ( $DI^+$ ) stem cell state, but also interferes with transcriptional programs induced  
204 by Delta-Notch signaling in EBs. To further investigate the interaction between  
205 Notch signaling and Klu activity in ISC differentiation, we performed epistasis  
206 experiments: the formation of large tumors consisting of proliferating ISCs and  
207 Pros-positive EEs in N loss of function conditions could be prevented by  
208 expression of Klu (*UAS-klu* expression in  $N^{RNAi}$  *esg-F/O* clones), which  
209 resulted in a complete block of both cell proliferation and EE differentiation  
210 (Figure S2). This suggests that Klu acts downstream of Notch in EC  
211 differentiation, but additionally acts as a potent inhibitor of cell proliferation.

212 We further combined expression of Klu (*UAS-Klu*) with expression of the  
213 oncogenic *Ras*<sup>V12</sup> variant (*UAS-Ras*<sup>V12</sup>) in *esg-F/O* clones. Whereas *esg-F/O*>  
214 *Ras*<sup>V12</sup> clones occupy the entire posterior midgut 2 days after induction and  
215 contribute to a significant loss of viability of the animal, co-expression of *UAS-*  
216 *klu* markedly reduced clonal size at this timepoint and rescued viability (Figure  
217 S3).

218 Altogether, our results indicate that the N-mediated transient expression of  
219 Klu in EBs is critical to restrict lineage commitment to the EC fate and inhibit  
220 proliferation, but that normal differentiation can only proceed once Klu is  
221 downregulated. To test this hypothesis, and to better understand the  
222 mechanism by which transient Klu expression controls EB cell fate, we  
223 decided to explore the progenitor cell-specific transcriptional program  
224 downstream of Klu.

225

## 226 **Transcriptome profiling supports a role for Klu in regulating Notch** 227 **signaling and EE fate repression**

228 To gain a comprehensive overview of the genes controlled by Klu in the  
229 intestine, we performed RNA-Sequencing on biological triplicate populations  
230 of FACS sorted Esg-positive progenitor cells in which we expressed either a  
231 *klu<sup>RNAi</sup>* construct or *UAS-klu* (see Figure 4A, Supplementary Figure S5 and  
232 Methods for details). To perform these studies, we used an approach  
233 previously described in <sup>29</sup>. We first confirmed that the transcriptome of sorted  
234 cells indeed reflects the excess EE differentiation phenotype seen in *klu<sup>RNAi</sup>*  
235 animals by performing qRT-PCR for *prospero* (*pros*) and *scute* (*sc*). The EE  
236 marker *pros* is upregulated 5-fold upon *klu<sup>RNAi</sup>* (Figure 4B). The proneural  
237 transcription factor Scute (*sc*) is necessary and sufficient for EE generation in  
238 the *Drosophila* midgut <sup>14,30,31</sup> and many upstream factors impinge on the  
239 expression of Sc to regulate EE differentiation <sup>32</sup>. mRNA levels of *sc* increase  
240 ~2.5-fold upon *klu<sup>RNAi</sup>* animals and *UAS-klu* expression completely abolishes  
241 *sc* mRNA expression in stem-progenitor cells (Figure 4B).

242 In addition, we checked the mRNA levels for Klu to verify knockdown and  
 243 overexpression efficiency. As expected, we see a 70% reduction in mRNA  
 244 levels upon *klu*<sup>RNAi</sup>. Surprisingly, we found that the expression of *klu* mRNA in  
 245 *UAS-klu*-expressing progenitor cells was almost completely abolished  
 246 compared to control (Figure 4C). This was contrary to our expectation of  
 247 detecting increased expression upon Gal4/UAS-mediated overexpression, but  
 248 was explained by the fact that the *UAS-klu* construct does not carry the  
 249 endogenous *klu* 3'UTR, which our primers targeted. Accordingly, primers that  
 250 target the coding region of *klu* (*klu* CDS) readily detect a ~12-fold upregulation  
 251 of *klu* transcript. Hence, while transgenic Klu was induced as expected, the  
 252 endogenous Klu gene was repressed, indicating that Klu may repress its own  
 253 expression. The notion of a negative autoregulatory loop was confirmed in our  
 254 RNA-seq data, as we saw increased reads in the CDS of the gene, and no  
 255 reads in the 3' UTR (Figure S5).

256 Comparing the transcriptomes of wild-type progenitors with the experimental  
 257 samples, we found 410 genes significantly upregulated in *klu*<sup>RNAi</sup> and 809  
 258 genes significantly downregulated in *UAS-klu*-expressing *esg*<sup>+</sup> cells (*P*<sub>adj</sub> <  
 259 0.05, log<sub>2</sub>FC > 0.5 or < -0.5). Given the role of Klu as a repressor of  
 260 transcription, we focused our RNA-Seq data analysis on genes that would be  
 261 upregulated in the absence of Klu, but downregulated upon *UAS-klu*  
 262 expression in *Esg*-positive stem-progenitor cells (Figure 4D). In this category  
 263 of 81 genes, many genes involved in the regulation of Notch signaling (the  
 264 HES/*E(Spl)*- complex genes *m6*, *m7*, *m8*, and the HES-like transcription factor  
 265 Deadpan), as well as several previously described regulators of EE  
 266 differentiation (encoding the proneural proteins Asense (*ase*), Scute (*sc*), and

the adaptor protein Phyllopod, *phyl*) could be identified (Figure 4E). Additional *E(Spl)* genes (*E(Spl)-mδ* and *E(Spl)-mγ*) were significantly upregulated in *klu*<sup>RNAi</sup> samples, but did not significantly change in *UAS-klu* samples (Figure 4E). *E(Spl)*-genes are a group of genes activated by Notch that mediate its downstream transcriptional response<sup>33</sup>. *Phyl*, in turn, acts to destabilize Tramtrack (*ttk*), a strong repressor of the *achaete-scute* complex genes *scute* and *asense*, and loss of which leads to a dramatic increase in EE numbers<sup>32,34</sup>. Reciprocally, loss of *phyl* stabilizes Ttk and results in a complete loss of EE cells in the midgut<sup>35</sup>. The induction of *phyl* in *klu* loss of function conditions thus explains the increase in EEs.

We also found that the expression of the transcription factor Charlatan (*chn*) is significantly downregulated by *UAS-klu* expression. Chn is a transcription factor that positively regulates the proneural genes Achaete and Scute and loss of Chn in the midgut leads to proliferation and differentiation defects in the stem-progenitor compartment<sup>36–38</sup>. Hence, Klu represses the expression of several genes that have reported roles in EE differentiation.

Our transcriptome data also revealed transcriptome changes downstream of Klu that may explain the Klu-induced exit from the stem cell state: stem cell maintenance is dependent on the Class I bHLH-family member Daughterless (Da)/E47-like, since loss of *da* results in loss of ISC fate and differentiation into enterocytes<sup>31</sup>. The gene *miranda* (*mira*) is a Da/proneural target gene that is also highly expressed in ISCs<sup>31,38</sup>. Proneural factors such as Ase and Sc require Da to dimerize and regulate transcription<sup>39</sup>. We found that loss of Klu results in a slight but significant upregulation of *mira* mRNA, whereas Klu overexpression results in a 2.3-fold downregulation (Figure 4E). To confirm



292 this, we used the *mira-Promoter-GFP* (*mira-GFP*) line and combined this with  
 293 *klu<sup>RNAi</sup>* and *UAS-klu*. Confocal microscopy and FACS-sorting of cells  
 294 expressing either *klu<sup>RNAi</sup>* and *UAS-klu* confirmed that *UAS-klu* expression  
 295 could reduce *mira-GFP* levels whereas a slight induction is seen in *klu<sup>RNAi</sup>*  
 296 cells (Figure 4F-I).

297 Taken together, we conclude that Klu has three main functions in EBs: 1) To  
 298 turn off the Notch transcriptional response by repressing E(Spl)-gene  
 299 expression, 2) to promote the exit from the stem cell state by repressing  
 300 genes like *mira*, and 3) To repress aberrant EE differentiation in the EB by  
 301 repressing proneural gene activation. By responding to N activity and  
 302 repressing its own expression, Klu further serves as a ‘timer’ for N-mediated  
 303 transcriptional responses in EBs.

304

### 305 **Klu acts upstream of the transcription factor Scute in EE differentiation**

306 Our genetic and transcriptional profiling experiments suggest that Klu likely  
 307 acts downstream of Notch, but upstream of the proneural genes Ase and Sc  
 308 in repressing EE differentiation (Figure 3, Figure 4, Figure S2). Scute plays a  
 309 critical role in a transcriptional loop that regulates both ISC proliferation and  
 310 the initiation of EE differentiation<sup>16</sup>. Our data indicate that Klu can act to  
 311 inhibit both proliferation and EE differentiation by affecting factors that  
 312 genetically act upstream of Scute (Figure 3 and Figure 4). Therefore, we  
 313 performed epistasis experiments with Klu and Sc to confirm this hypothesis.  
 314 We generated *esg-F/O* clones that express *klu<sup>RNAi</sup>* in the presence or absence  
 315 of *sc<sup>RNAi</sup>*. Clones expressing *klu<sup>RNAi</sup>* contained more EE cells compared to  
 316 control clones (Figure 5A-B), whereas clones expressing *sc<sup>RNAi</sup>* are almost

completely devoid of EE cells (Figure 5C). The combination of *klu*<sup>RNAi</sup> and  
*sc*<sup>RNAi</sup> also resulted in clones with little or no EE differentiation, as quantified  
by the number of Pros-positive cells (Figure 5D, quantification in 5E). This  
suggests that the appearance of extra EE cells in *klu*<sup>RNAi</sup>-expressing clones  
depends on Scute. To confirm that Scute would act downstream of Klu in  
determining EE fate, we combined overexpression of Scute and Klu. Clonal  
expression of Scute using the *esg-F/O* system resulted in clones consisting  
almost entirely of Pros-positive EE cells whereas clones expressing *UAS-klu*  
are completely devoid of EE cells (Figure 5F, Figure S6A-D). Co-expression  
of Klu and Scute leads to a marked reduction in clone size (Figure S6F) but  
EE differentiation was observed in a large fraction of the clones, although the  
percentage of differentiated cells is reduced compared to *UAS-Sc* alone  
(Figure 5F). We conclude that Scute can still induce EE differentiation, even in  
Klu gain-of-function conditions.

We observed an increase in the number of Pros-pH3 double-positive cells in  
*UAS-Sc* compared to control, likely representing the EE-progenitor cells (EEp)  
undergoing a final round of division<sup>16</sup>. Strikingly, this percentage increased in  
*esg-F/O > UAS-klu+UAS-sc* clones (Figure S6E). Since the clonal size in this  
genotype is no larger than in *esg-F/O>UAS-klu* single overexpression clones  
(Figure S6F), indicating that these cells might be arrested in mitosis. This  
suggests that although Klu expression cannot completely repress *UAS-Sc*-  
induced EE differentiation, the effect of Klu on cell cycle progression interferes  
with the proliferation-inducing capacity of Scute.

## 342 **Klu directly represses several genes that regulate EE fate, Notch** 343 **signaling and the cell cycle**

344 To identify genes that are directly regulated by Klu, we performed targeted  
345 DamID of Klu in esg-positive stem-progenitor cells <sup>40</sup>. We used the DamID-  
346 seq pipeline <sup>41</sup>, see Methods) to identify 1667 genes that had 1 or more Klu  
347 binding peak(s) within 2 KB of their gene body in all 3 replicates. Using 2  
348 published position weight matrices for Klu-binding <sup>42</sup>, we could establish that  
349 692 of the 1667 genes (41.5%) had 1 or more Klu-binding motif(s) present in  
350 their binding peaks. We considered these peaks as high-confidence Klu-  
351 bound sites. Our transcriptomics data on Klu indicated that Klu controls many  
352 genes involved in Notch signaling, EE differentiation and cell cycle regulation.  
353 We identified a cluster of binding sites at the centrosomal end of the *E(Spl)*-  
354 locus around the *E(Spl)-mδ* and *E(Spl)-mγ* genes (Figure 6E). Since our  
355 RNA-Seq data showed that many of the *E(Spl)*-genes change expression in  
356 both *klu<sup>RNAi</sup>* and *UAS-klu* conditions (Figure 4E), this suggests that Klu could  
357 possibly regulate the expression of multiple members of the *E(Spl)*-complex  
358 through this binding peak at the centrosomal end of the *E(Spl)*-locus.  
359 Furthermore, we identified a Klu-Dam binding peak at the *klu* locus,  
360 supporting our hypothesis that Klu acts in an autoregulatory loop by  
361 negatively regulating its own expression (Figure 6A). Previous work has  
362 shown that Scute and the *E(Spl)*-complex member *E(Spl)m8-HLH* act in a  
363 regulatory loop to generate an EE precursor directly from the ISC <sup>16</sup>. Since  
364 our results indicate that Scute is upregulated upon loss of Klu and acts  
365 epistatically to Klu in EE formation, we first looked for Klu binding in and  
366 around the *scute* locus. We did not find significant binding of Klu-Dam around

any of the genes in the Achaete/Scute complex. However, we did identify a DamID peak around the *sina* and *sinah* loci (Figure 6B). Together with the adaptor protein Phyllopod, the Sina and Sinah E3-ubiquitin ligases are able to degrade the transcriptional repressor Tramtrack (*ttk*), which represses EE fate<sup>32,35</sup>. *sina* transcript levels are upregulated 2.2-fold upon *klu* RNAi and *phyl* levels are upregulated 8-fold as well as downregulated 15-fold upon *UAS-klu* expression (Figure 4E). Hence, we propose that Klu represses EE-fate determination in EBs upstream of Scute by stabilizing Tramtrack, since Klu directly represses the members of the E3-ligase complex Sina, Sinah and (indirectly) Phyl that can normally target Ttk for destruction.

In addition to genes involved in Notch signaling and EE-specification, we find evidence for direct repression of critical cell cycle regulators by Klu. We find Klu binding peaks at both the Cyclin B (*CycB*) and Cyclin E (*CycE*) loci (Figure 6C and D), two Cyclins that are essential for G1-S and G2-M progression respectively. *CycE* is also upregulated upon *klu* RNAi expression. Notch activation is essential for the mitotic-to-endocycle switch in follicle cells of the *Drosophila* ovary, and polyploidization is a critical step in the normal process of EB-to-EC differentiation<sup>43,44</sup>. We propose that Klu plays a role in remodeling the cell cycle in response to Notch activation by directly repressing 2 critical cell cycle regulators. Furthermore, this explains how Klu acts as a potent suppressor of cell proliferation, even in combination of the strongly oncogenic RasV12 overexpression (Figure 3 and Figure S3).

391 Altogether, our data suggest a model (Figure 6G) in which Klu acts as a Notch  
 392 effector in the EB that acts to restrict the duration of the Notch transcriptional  
 393 response (through negative regulation of the E(Spl)-complex members and  
 394 Klu itself). Second, Klu prevents activation of the Scute-E(Spl)m8  
 395 transcriptional circuit that triggers EE differentiation. Finally, we find evidence  
 396 that Klu can bind and repress critical cell cycle regulators such as Cyclin B  
 397 and Cyclin E, likely promoting the switch from a mitotic to an endoreplicating  
 398 cell cycle in differentiating ECs.

399

400

## 401 Discussion

402 Our work identified a mechanism by which lineage decisions are cemented  
 403 through the coordinated repression of alternative fates and of cell proliferation  
 404 in somatic stem cell daughter cells. N-induced expression of Klu in EBs is  
 405 necessary to repress EE fates in EBs, but also to temporally restrict N target  
 406 gene expression. Hence, its own expression has to be self-regulated to allow  
 407 differentiation to ECs to proceed. We find that Klu represses several genes  
 408 that are critical for EE differentiation; most notably genes that influence the  
 409 accumulation of the transcription factor Scute. Transient expression of Scute  
 410 is necessary and sufficient for EE differentiation and the transient nature of  
 411 Scute activation is accomplished by a double-negative feedback loop between  
 412 Scute and E(Spl)m8<sup>16</sup>. The expression of Klu results in the repression of both  
 413 transcription factors in EBs, inactivating the transcriptional circuit that governs  
 414 EE differentiation (Figure 6F). Previous work on Klu has shown that Klu is  
 415 directly regulated by Su(H) and acts as a Notch effector in hemocyte  
 416 differentiation<sup>45</sup>. In the ISC lineage, we find that overexpression of Klu results  
 417 in the loss of Notch signaling activity in progenitor cell clones, and that Klu is  
 418 able to repress several Notch effector genes (such as the HES/E(Spl) family  
 419 and HES/E(Spl)-like genes such as Deadpan). We thus propose that Klu acts  
 420 in a negative feedback loop downstream of Notch signaling to ensure that  
 421 Notch effector gene activity is transient in EBs, mirroring the transient nature  
 422 of EE specification by Scute and E(Spl)m8.

423 Loss of WT1 in the mouse kidney results in glomerulosclerosis and is  
 424 accompanied by ectopic expression of HES/E(Spl) family genes<sup>46</sup> and in  
 425 zebrafish kidney podocytes Notch expression induces *Wt1* transcription, while

the Notch intracellular domain (NICD) and WT1 synergistically promote transcription at the promoter of the HES/E(Spl) family gene *Hey1*<sup>47</sup>. This suggests that the negative feedback between Notch and its effector Klu/WT1 might be conserved between species, even though conservation at the sequence level between these transcription factors is low.

Our data also support a role for Klu for regulating cell cycle progression. Overexpression of Klu results in a strong block in cell proliferation in *N<sup>RNAi</sup>* or oncogenic *Ras<sup>V12</sup>*-induced tumors and our DamID binding studies suggest that Klu can directly regulate Cyclins B and E. This is in stark contrast to its role in the neuroblast stem cell lineage, where overexpression of Klu leads to a strong overproliferation of immature neural progenitor cells and the resulting formation of brain tumors that can be transplanted to distant regions of the body and continue to grow<sup>20,21</sup>. However, this likely reflects the different role for Notch in the NB lineage, where continuous activation of Notch also leads to INP overproliferation and tumor formation. Thus, the role of Klu in promoting either lineage differentiation or stem-progenitor cell proliferation seems to be context-dependent. This is reminiscent of the context-specific rules for Notch as either a tumor suppressor or an oncogene in mammalian adult stem cell lineages. For instance, activating Notch1 mutations are the main driver of T-cell acute lymphoblastic leukemia<sup>48</sup>, whereas Notch-inactivating mutations are found in many epithelial-derived solid tumor types such as head-and-neck or skin carcinomas (see<sup>49</sup> and references therein).

Similarly, *Wt1* was initially identified as a tumor-suppressor gene mutated in the rare pediatric kidney cancer Wilms' Tumor<sup>50</sup>. Recently, WT1 was also identified as a strong inhibitor of proliferation in a genome-wide gain-of-

451 function screen for tumor suppressors and oncogenes<sup>51</sup>. However,  
 452 expression of WT1 was found to be elevated in many solid tumors and in  
 453 acute myeloid leukemia<sup>52,53</sup>. Thus, similar to Notch, the role of WT1 in  
 454 tumorigenesis seems to be highly context-dependent. Intriguingly, in both  
 455 nephric and hematopoietic lineages WT1 is often transiently expressed in  
 456 committed progenitor cells, similar to the expression of Klu in the EB  
 457 progenitors, raising the possibility that to fully understand the role of WT1-like  
 458 proteins in tumorigenesis, cell lineage relationships, as well as cell  
 459 proliferation and differentiation events in tumors need to be taken into  
 460 account.

461 Critically, our work highlights the role for transient transcriptional ‘rewiring’  
 462 events during cell specification in somatic stem cell lineages. Such events  
 463 seem to be required to ensure lineage commitment downstream of initial  
 464 symmetry breaking signals like Notch, and ensure progression of cell  
 465 differentiation into a defined lineage. As such, it can be expected that similar  
 466 transcriptional feedback loops need to be reversed for cells to undergo de-  
 467 differentiation into stem cells in mammalian regenerating tissues. We propose  
 468 that understanding their makeup and regulation will significantly advance  
 469 efforts to control tissue repair and regeneration in mammals, including  
 470 humans.



## 471 **Methods**

### 472 **Fly strains and husbandry**

473 The following strains were obtained from the Bloomington Stock Center:

474 BL28731 (*klu* RNAi on 3rd) BL60469 (*klu* RNAi on 2nd), BL56535 (*UAS-*  
475 *klu*<sup>[Hto]</sup>), BL11651 (*Df*<sup>05151</sup>-*lacZ*) BL26206 (*sc* RNAi), BL51672 (*UAS-sc*),  
476 BL1997 (*w*<sup>[\*]</sup>; *P*{*w*[+*mW.hs*]=*FRT(w[hs])*}2A), BL4540 (*w*<sup>[\*]</sup>; *P*{*w*[+*mC*]=*UAS-*  
477 *FLP.D*}*JD2*). BL65433 (*y*[1] *w*<sup>[\*]</sup>; *M*{*w*[+*mC*]=*hs.min(FRT.STOP1)dam*}*ZH-*  
478 *51C*) BL1672 (*w*[1118]; *sna*[*Sco*]/*CyO*, *P*{*ry*[+*t7.2*]=*en1*}*wg[en11]*).  
479 VDRC: v27228 (*N* RNAi). Other stocks: *klu-Gal4 UAS-GFP, FRT2A*  
480 *kluR51/Tm6B, hs-Flp, Tub-Gal4, UAS-GFP/Fm7;FRT2A,*  
481 *TubGal80ts/Tm2,Ubx* (T. Klein, Düsseldorf) *UAS-kluFL, UAS-ERD-kluZF,*  
482 *UAS-VP16-kluZF* (C.Y. Lee, U. Michigan) *esg-F/O (w; esg-Gal4, tub-Gal80ts,*  
483 *UAS-GFP; UAS-flp, Act>CD2>Gal4(UAS-GFP)/TM6B), esg<sup>ts</sup> (y,w;esg-Gal4,*  
484 *UAS-GFP/CyO;tub-Gal80ts/Tm3), Su(H)<sup>ts</sup> (w;Su(H)GBE-Gal4,UAS-CD8-*  
485 *GFP/CyO;tub-Gal80<sup>ts</sup>/TM3), ISC-specific esg<sup>ts</sup> (Wang et al., 2014) w;esg-*  
486 *GAL4,UAS-2XEYFP/CyO;Su(H)GBE-GAL80,tub-Gal80ts/TM3,Sb, w;esg-*  
487 *gal4, tub-Gal80ts, UAS-GFP/CyO,wg-lacZ;P{w[+mC]=UAS-FLP.D}JD2/Tm6B.*

488 Stocks generated in this study: *w;Klu-Dam(ZH-51C) M4M1/CyO,*

489 *P{ry[+t7.2]=en1}wg[en11]*

490

### 491 **Immunostaining and microscopy**

492 Midgut immunostaining was performed as described in <sup>54</sup>. Antibodies used  
493 include: Chicken anti-GFP (1:1000, ThermoFisher A10262), mouse anti-  
494 Prospero (MR1A, 1:50, DSHB), mouse anti-β-galactosidase (40-1a, 1:200,  
495 DSHB), rabbit anti-β-galactosidase (1:200, ThermoFisher A11132) mouse

496 anti-Armadillo (N2 7A1, 1:20, DSHB), rabbit anti-phosphorylated Histone H3-  
 497 Ser10 (pH3S10, 1:500, sc8656-R, Santa Cruz Biotechnology). Images were  
 498 taken from the R5 and R4 regions of the posterior midgut on a Zeiss Apotome  
 499 microscope or Zeiss LSM710 confocal at either 20X or 40X magnification.  
 500 Images were captured as Z-stacks with 8-10 slices of 0.22-1.0  $\mu\text{m}$  thickness.  
 501 Images were converted to maximum-intensity projections in Fiji (<https://fiji.sc>)  
 502 and quantifications were performed using the CellCounter Fiji plugin. Scale  
 503 bar = 50  $\mu\text{m}$  in all images, except in Figure 1A: scale bar = 25  $\mu\text{m}$ . Graphing,  
 504 statistical analysis and survival curves were produced in GraphPad Prism.

505

## 506 **Cloning and transgene generation**

507 We used the Inducible DamID system from the Van Steensel lab to generate  
 508 *klu-Dam*<sup>40</sup>. To this end, we amplified the Klu Full-length cDNA (derived from  
 509 BDGP Gold clone F101015) using *AscI* and *NotI*-containing primers and  
 510 cloned the fragment into the vector *p-attB-min.hsp70P-FRT-STOP#1-FRT-*  
 511 *DamMyc[open]* (Addgene plasmid #71809). Transgenic lines were generated  
 512 by Genetivision Inc. using the  $\phi\text{C31}$  integrase-mediated site-specific  
 513 transgenesis system<sup>55</sup>. The finished construct was injected into Bloomington  
 514 stock BL24482 (*ZH-51C* attP-site on 2nd) and the resulting transgenic lines  
 515 were tested by genotyping PCR. Both control (Dam-only, BL65433) and *klu-*  
 516 Dam transgenic lines were crossed to BL1672 (*w[1118]; sna[Sco]/CyO,*  
 517 *P{ry[+t7.2]=en1}wg[en11]*) before use.

518

## 519 **DamID**

Control Dam-only (BL65433) and *klu*-Dam male flies were crossed to *w;esg-gal4, tub-Gal80ts, UAS-GFP/CyO, wg-lacZ; P{w[+mC]=UAS-FLP.D}JD2/Tm6B* virgins. Crosses were maintained at 18°C and progeny was shifted to 29°C for 24 hours to induce the Flp-mediated recombination of the STOP-Cassette. 30-50 midguts of Dam-only and *klu*-Dam were dissected in 1X PBS in 3 different batches and used for isolation of total genomic DNA. Isolation of methylated GATC-sequences and subsequent amplification was done according to the protocol published by Marshall et al.<sup>56</sup> until Step 34, from which we continued NGS library preparation using the Illumina TruSeq nano DNA kit LT. After library quality control, samples were sequenced as 50 bp single-end on an Illumina HiSeq2500.

531

## 532 **Midgut FACS, RNA-isolation and Sequencing**

Midgut dissociation and FACS was performed as described in<sup>29</sup>. UAS-expression of *UAS-klu* or *klu*<sup>RNAi</sup> was induced for 2 days, followed by 16 hours of *Ecc15* infection to stimulate midgut turnover. We dissected 100 midguts/genotype in triplicate and for each sample 20,000-40,000 cells were sorted into RNase-free 1X PBS with 5 mM EDTA. RNA was isolated using the Arcturus PicoPure™ RNA Isolation Kit. Subsequently, the entire amount of isolated RNA was used as input for RNA-amplification using the Arcturus™ RiboAmp™ HS PLUS Kit. 200 ng of amplified aRNA was used as input for RNA-Seq library preparation using the TruSeq Stranded mRNA Library Prep Kit (Illumina) and samples were subsequently sequenced as 50 bp single-end on an Illumina HiSeq2500.

544

## 545 **Quantitative real-time PCR**

546 Quantitative real-time PCR (qRT-PCR) was performed using aRNA from  
 547 FACS-sorted *esg*<sup>+</sup> cell populations (see above) as template. qRT-PCR was  
 548 performed using the TaqMan FAM-MGB system in a 10 µl reaction on a  
 549 BioRad CFX384 C1000 Touch Cyclor using the following probes: *klu*  
 550 (*dm02361358 s1*), *pros* (*dm02135674 g1*), *sc* (*dm01841751 s1*) and *Act5C*  
 551 (*dm02361909 s1*) was used for normalization. The *klu* CDS primer assay was  
 552 ordered as a Custom TaqMan Assay. Reactions were performed in triplicate  
 553 on 3 independent biological replicates. Relative expression was quantified  
 554 using the  $\Delta\Delta C_t$  method. Data were calculated using Microsoft Excel and  
 555 plotted as relative fold-changes +/- SEM in Graphpad Prism.

556

## 557 **RNA-Seq and DamID data analysis**

558 The 15-21 million quality-passed reads per sample were mapped to the *D.*  
 559 *melanogaster* reference genome (BDGP6) with TopHat2 (version 2.1.0)<sup>57</sup>. Of  
 560 each sample, approximately 80% of the reads was mapped to the genome.  
 561 From this, 90% could be assigned to genes using FeatureCounts resulting in  
 562 11-15 million analysis-ready reads per sample<sup>58</sup>.  
 563 The table of raw counts per gene/sample was analyzed with the R package  
 564 DESeq2 (version 1.16.1) for differential expression<sup>59</sup>. Both sample groups of  
 565 interest (UAS & RNAi) were pair-wise contrasted with the control sample  
 566 group (control). For each gene of each comparison, the p-value was  
 567 calculated using the Wald significance test. Resulting p-values were adjusted  
 568 for multiple testing with Benjamini & Hochberg correction. Genes with an  
 569 adjusted p-value <0.05 are considered differentially expressed (DEGs).

570 For DamID, we used the damid\_seq pipeline <sup>41</sup> to generate binding profiles for  
571 Klu-Dam. Triplicate samples for Klu-Dam (34.9, 33.5 and 34.1 millions reads)  
572 and Dam-only control (34.7, 34.5, and 35.6 million reads) were aligned to the  
573 *Drosophila* genome (UCSC dm6). Overall aligning rate was between 86% and  
574 91% across all samples. First, 'gat.track.maker.pl' script was used to build a  
575 GATC fragment file. Then the main utility 'damidseq\_pipeline' was used to  
576 align the reads to the genome using bowtie2, bin and count reads, normalize  
577 counts, and compute log2 ratio between corresponding DamID and control  
578 Dam-only samples. The pipeline identified 1,707, 1,663, 1,681 peaks with  
579 FDR<0.01 per each replicate. To test for reproducibility we first used Marshall  
580 OJ's damid\_pipeline to identify peaks with weaker confidence (FDR< 0.1) and  
581 the 'idr' python package (<https://github.com/nboley/idr>) to identify 1,169  
582 peaks with IDR<0.05 between replicate1 and replicate2. We used an in-house  
583 developed script to annotate peaks in proximity to genes. 1,667 genes found  
584 to be in proximity to at least one reproducible peak. To find Klu binding motifs  
585 in our reproducible peak set, we scanned for 2 different Klu PWM (described  
586 in <sup>42</sup>) around reproducible peaks using the FIMO tool <sup>60</sup>. Reads were  
587 visualized using IGV as overlaid triplicate Klu-Dam (log<sub>2</sub>FC over Dam-only)  
588 tracks.  
589

## 590 **Acknowledgements**

591 The authors would like to thank Thomas Klein, C.Y. Lee, Sarah Bray, Claude  
592 Desplan, Benoit Biteau, Cai Yu and Bruce Edgar □for providing fly stocks and  
593 antibodies, the Bloomington *Drosophila* Stock Center, The VDRC (Vienna)  
594 and the Developmental Studies Hybridoma Bank (DSHB) for fly stocks and  
595 antibodies, and Maria Locke, Marco Groth, Philipp Koch and Karol Szafranski  
596 from the Flow Cytometry, Sequencing and Bioinformatics Core Facilities at  
597 the FLI-Leibniz Institute on Aging for expert technical assistance. This work  
598 was supported by DFG research grant number KO5594/1-1 to J.K.

599

## 600 **Author contributions**

601 J.K and H.J conceived the project and designed experiments. J.K., M.B. and  
602 E.M. performed experiments and collected data. T.R-O. performed data  
603 analysis on the RNA-Seq and DamID samples. P.S-V. provided preliminary  
604 data for the study. J.K. and H.J. wrote the manuscript.

605

## 606 **Competing interests**

607 The authors declare no competing financial interests.

608

609

610

## 611 Bibliography

- 612  
613 1. Tetteh, P. W. *et al.* Replacement of Lost Lgr5-Positive Stem Cells through  
614 Plasticity of Their Enterocyte-Lineage Daughters. *Cell Stem Cell* **18**, 203–  
615 213 (2016).  
616
- 617 2. Yan, K. S. *et al.* Intestinal Enteroendocrine Lineage Cells Possess  
618 Homeostatic and Injury-Inducible Stem Cell Activity. *Cell Stem Cell* **21**,  
619 78–90.e6 (2017).  
620
- 621 3. Micchelli, C. A. & Perrimon, N. Evidence that stem cells reside in the adult  
622 *Drosophila* midgut epithelium. *Nature* **439**, 475–479 (2006).  
623
- 624 4. Ohlstein, B. & Spradling, A. The adult *Drosophila* posterior midgut is  
625 maintained by pluripotent stem cells. *Nature* **439**, 470–474 (2006).  
626
- 627 5. Buchon, N., Broderick, N. A., Poidevin, M., Pradervand, S. & Lemaitre, B.  
628 *Drosophila* intestinal response to bacterial infection: activation of host  
629 defense and stem cell proliferation. *Cell Host Microbe* **5**, 200–211 (2009).  
630
- 631 6. Jiang, H. *et al.* Cytokine/Jak/Stat signaling mediates regeneration and  
632 homeostasis in the *Drosophila* midgut. *Cell* **137**, 1343–1355 (2009).  
633
- 634 7. Biteau, B., Hochmuth, C. E. & Jasper, H. JNK activity in somatic stem  
635 cells causes loss of tissue homeostasis in the aging *Drosophila* gut. *Cell*  
636 *Stem Cell* **3**, 442–455 (2008).  
637
- 638 8. Li, H. & Jasper, H. Gastrointestinal stem cells in health and disease: from  
639 flies to humans. *Dis Model Mech* **9**, 487–499 (2016).  
640
- 641 9. Choi, N.-H., Kim, J.-G., Yang, D.-J., Kim, Y.-S. & Yoo, M.-A. Age-related  
642 changes in *Drosophila* midgut are associated with PVF2, a PDGF/VEGF-  
643 like growth factor. *Aging Cell* **7**, 318–334 (2008).  
644
- 645 10. Ohlstein, B. & Spradling, A. Multipotent *Drosophila* intestinal stem cells  
646 specify daughter cell fates by differential notch signaling. *Science* **315**,  
647 988–992 (2007).  
648
- 649 11. Perdigoto, C. N., Schweisguth, F. & Bardin, A. J. Distinct levels of Notch  
650 activity for commitment and terminal differentiation of stem cells in the  
651 adult fly intestine. *Development* **138**, 4585–4595 (2011).  
652
- 653 12. Patel, P. H., Dutta, D. & Edgar, B. A. Niche appropriation by *Drosophila*  
654 intestinal stem cell tumours. *Nat Cell Biol* **17**, 1182–1192 (2015).  
655
- 656 13. Siudeja, K. *et al.* Frequent Somatic Mutation in Adult Intestinal Stem Cells  
657 Drives Neoplasia and Genetic Mosaicism during Aging. *Cell Stem Cell* **17**,  
658 663–674 (2015).  
659

- 660 14. Zeng, X. & Hou, S. X. Enteroendocrine cells are generated from stem  
661 cells through a distinct progenitor in the adult *Drosophila* posterior midgut.  
662 *Development* **142**, 644–653 (2015).  
663
- 664 15. Biteau, B. & Jasper, H. Slit/Robo signaling regulates cell fate decisions in  
665 the intestinal stem cell lineage of *Drosophila*. *Cell Rep* **7**, 1867–1875  
666 (2014).  
667
- 668 16. Chen, J. *et al.* Transient Scute activation via a self-stimulatory loop directs  
669 enteroendocrine cell pair specification from self-renewing intestinal stem  
670 cells. *Nat Cell Biol* **20**, 152–161 (2018).  
671
- 672 17. Antonello, Z. A., Reiff, T., Ballesta-Illan, E. & Dominguez, M. Robust  
673 intestinal homeostasis relies on cellular plasticity in enteroblasts mediated  
674 by miR-8-Escargot switch. *EMBO J* **34**, 2025–2041 (2015).  
675
- 676 18. Klein, T. & Campos-Ortega, J. A. klumpfuss, a *Drosophila* gene encoding  
677 a member of the EGR family of transcription factors, is involved in bristle  
678 and leg development. *Development* **124**, 3123–3134 (1997).  
679
- 680 19. Yang, X., Bahri, S., Klein, T. & Chia, W. Klumpfuss, a putative *Drosophila*  
681 zinc finger transcription factor, acts to differentiate between the identities  
682 of two secondary precursor cells within one neuroblast lineage. *Genes*  
683 *Dev* **11**, 1396–1408 (1997).  
684
- 685 20. Xiao, Q., Komori, H. & Lee, C.-Y. klumpfuss distinguishes stem cells from  
686 progenitor cells during asymmetric neuroblast division. *Development* **139**,  
687 2670–2680 (2012).  
688
- 689 21. Berger, C. *et al.* FACS purification and transcriptome analysis of  
690 *drosophila* neural stem cells reveals a role for Klumpfuss in self-renewal.  
691 *Cell Rep* **2**, 407–418 (2012).  
692
- 693 22. Sousa-Victor, P. *et al.* Piwi is required to limit exhaustion of aging somatic  
694 stem cells. *Cell Rep* **20**, 2527–2537 (2017).  
695
- 696 23. Korzeliuss, J. *et al.* Escargot maintains stemness and suppresses  
697 differentiation in *Drosophila* intestinal stem cells. *EMBO J* **33**, 2967–2982  
698 (2014).  
699
- 700 24. Kaspar, M., Schneider, M., Chia, W. & Klein, T. Klumpfuss is involved in  
701 the determination of sensory organ precursors in *Drosophila*. *Dev Biol*  
702 **324**, 177–191 (2008).  
703
- 704 25. McGuire, S. E., Mao, Z. & Davis, R. L. Spatiotemporal gene expression  
705 targeting with the TARGET and gene-switch systems in *Drosophila*. *Sci*  
706 *STKE* **2004**, pl6 (2004).  
707
- 708 26. Lee, T. & Luo, L. Mosaic analysis with a repressible cell marker (MARCM)  
709 for *Drosophila* neural development. *Trends Neurosci* **24**, 251–254 (2001).



- 710
- 711 27. Lee, W.-C., Beebe, K., Sudmeier, L. & Micchelli, C. A. Adenomatous
- 712 polyposis coli regulates *Drosophila* intestinal stem cell proliferation.
- 713 *Development* **136**, 2255–2264 (2009).
- 714
- 715 28. Janssens, D. H. *et al.* An Hdac1/Rpd3-Poised Circuit Balances Continual
- 716 Self-Renewal and Rapid Restriction of Developmental Potential during
- 717 Asymmetric Stem Cell Division. *Dev Cell* **40**, 367–380.e7 (2017).
- 718
- 719 29. Dutta, D., Xiang, J. & Edgar, B. A. RNA expression profiling from FACS-
- 720 isolated cells of the *Drosophila* intestine. *Curr Protoc Stem Cell Biol* **27**,
- 721 Unit 2F.2. (2013).
- 722
- 723 30. Amcheslavsky, A. *et al.* Enteroendocrine cells support intestinal stem-cell-
- 724 mediated homeostasis in *Drosophila*. *Cell Rep* **9**, 32–39 (2014).
- 725
- 726 31. Bardin, A. J., Perdigoto, C. N., Southall, T. D., Brand, A. H. &
- 727 Schweisguth, F. Transcriptional control of stem cell maintenance in the
- 728 *Drosophila* intestine. *Development* **137**, 705–714 (2010).
- 729
- 730 32. Wang, C., Guo, X., Dou, K., Chen, H. & Xi, R. Ttk69 acts as a master
- 731 repressor of enteroendocrine cell specification in *Drosophila* intestinal
- 732 stem cell lineages. *Development* **142**, 3321–3331 (2015).
- 733
- 734 33. Delidakis, C., Monastirioti, M. & Magadi, S. S. E(spl): genetic,
- 735 developmental, and evolutionary aspects of a group of invertebrate Hes
- 736 proteins with close ties to Notch signaling. *Curr Top Dev Biol* **110**, 217–
- 737 262 (2014).
- 738
- 739 34. Pi, H., Huang, S.-K., Tang, C.-Y., Sun, Y. H. & Chien, C.-T. phyllopod is a
- 740 target gene of proneural proteins in *Drosophila* external sensory organ
- 741 development. *Proc Natl Acad Sci U S A* **101**, 8378–8383 (2004).
- 742
- 743 35. Yin, C. & Xi, R. A Phyllopod-Mediated Feedback Loop Promotes Intestinal
- 744 Stem Cell Enteroendocrine Commitment in *Drosophila*. *Stem Cell Reports*
- 745 **10**, 43–57 (2018).
- 746
- 747 36. Escudero, L. M., Caminero, E., Schulze, K. L., Bellen, H. J. & Modolell, J.
- 748 Charlatan, a Zn-finger transcription factor, establishes a novel level of
- 749 regulation of the proneural achaete/scute genes of *Drosophila*.
- 750 *Development* **132**, 1211–1222 (2005).
- 751
- 752 37. Amcheslavsky, A. *et al.* Gene expression profiling identifies the zinc-finger
- 753 protein Charlatan as a regulator of intestinal stem cells in *Drosophila*.
- 754 *Development* **141**, 2621–2632 (2014).
- 755
- 756 38. Reeves, N. & Posakony, J. W. Genetic programs activated by proneural
- 757 proteins in the developing *Drosophila* PNS. *Dev Cell* **8**, 413–425 (2005).
- 758
- 759 39. Cabrera, C. V. & Alonso, M. C. Transcriptional activation by heterodimers

- 760 of the achaete-scute and daughterless gene products of *Drosophila*.  
761 *EMBO J* **10**, 2965–2973 (1991).  
762
- 763 40. Pindyurin, A. V., Pagie, L., Kozhevnikova, E. N., van Arensbergen, J. &  
764 van Steensel, B. Inducible DamID systems for genomic mapping of  
765 chromatin proteins in *Drosophila*. *Nucleic Acids Res* **44**, 5646–5657  
766 (2016).  
767
- 768 41. Marshall, O. J. & Brand, A. H. damidseq\_pipeline: an automated pipeline  
769 for processing DamID sequencing datasets. *Bioinformatics* **31**, 3371–  
770 3373 (2015).  
771
- 772 42. Nitta, K. R. *et al.* Conservation of transcription factor binding specificities  
773 across 600 million years of bilateria evolution. *elife* **4**, (2015).  
774
- 775 43. Shcherbata, H. R., Althausen, C., Findley, S. D. & Ruohola-Baker, H. The  
776 mitotic-to-endocycle switch in *Drosophila* follicle cells is executed by  
777 Notch-dependent regulation of G1/S, G2/M and M/G1 cell-cycle  
778 transitions. *Development* **131**, 3169–3181 (2004).  
779
- 780 44. Xiang, J. *et al.* EGFR-dependent TOR-independent endocycles support  
781 *Drosophila* gut epithelial regeneration. *Nat Commun* **8**, 15125 (2017).  
782
- 783 45. Terriente-Felix, A. *et al.* Notch cooperates with Lozenge/Runx to lock  
784 haemocytes into a differentiation programme. *Development* **140**, 926–937  
785 (2013).  
786
- 787 46. Asfahani, R. I. *et al.* Activation of podocyte Notch mediates early Wt1  
788 glomerulopathy. *Kidney Int* **93**, 903–920 (2018).  
789
- 790 47. O'Brien, L. L. *et al.* Wt1a, Foxc1a, and the Notch mediator Rbpj physically  
791 interact and regulate the formation of podocytes in zebrafish. *Dev Biol*  
792 **358**, 318–330 (2011).  
793
- 794 48. Weng, A. P. *et al.* Activating mutations of NOTCH1 in human T cell acute  
795 lymphoblastic leukemia. *Science* **306**, 269–271 (2004).  
796
- 797 49. Ntziachristos, P., Lim, J. S., Sage, J. & Aifantis, I. From fly wings to  
798 targeted cancer therapies: a centennial for notch signaling. *Cancer Cell*  
799 **25**, 318–334 (2014).  
800
- 801 50. Call, K. M. *et al.* Isolation and characterization of a zinc finger polypeptide  
802 gene at the human chromosome 11 Wilms' tumor locus. *Cell* **60**, 509–520  
803 (1990).  
804
- 805 51. Sack, L. M. *et al.* Profound tissue specificity in proliferation control  
806 underlies cancer drivers and aneuploidy patterns. *Cell* (2018).  
807 doi:10.1016/j.cell.2018.02.037  
808
- 809 52. Qi, X. *et al.* Wilms' tumor 1 (WT1) expression and prognosis in solid

810 cancer patients: a systematic review and meta-analysis. *Sci Rep* **5**, 8924  
811 (2015).  
812  
813 53. Huff, V. Wilms' tumours: about tumour suppressor genes, an oncogene  
814 and a chameleon gene. *Nat Rev Cancer* **11**, 111–121 (2011).  
815  
816 54. Resnik-Docampo, M. *et al.* Tricellular junctions regulate intestinal stem  
817 cell behaviour to maintain homeostasis. *Nat Cell Biol* **19**, 52–59 (2017).  
818  
819 55. Bischof, J., Maeda, R. K., Hediger, M., Karch, F. & Basler, K. An  
820 optimized transgenesis system for Drosophila using germ-line-specific  
821 phiC31 integrases. *Proc Natl Acad Sci U S A* **104**, 3312–3317 (2007).  
822  
823 56. Marshall, O. J., Southall, T. D., Cheetham, S. W. & Brand, A. H. Cell-type-  
824 specific profiling of protein-DNA interactions without cell isolation using  
825 targeted DamID with next-generation sequencing. *Nat Protoc* **11**, 1586–  
826 1598 (2016).  
827  
828 57. Kim, D. *et al.* TopHat2: accurate alignment of transcriptomes in the  
829 presence of insertions, deletions and gene fusions. *Genome Biol* **14**, R36  
830 (2013).  
831  
832 58. Liao, Y., Smyth, G. K. & Shi, W. featureCounts: an efficient general  
833 purpose program for assigning sequence reads to genomic features.  
834 *Bioinformatics* **30**, 923–930 (2014).  
835  
836 59. Love, M. I., Huber, W. & Anders, S. Moderated estimation of fold change  
837 and dispersion for RNA-seq data with DESeq2. *Genome Biol* **15**, 550  
838 (2014).  
839  
840 60. Grant, C. E., Bailey, T. L. & Noble, W. S. FIMO: scanning for occurrences  
841 of a given motif. *Bioinformatics* **27**, 1017–1018 (2011).  
842  
843  
844

## 845 **Figure legends**

846 **Figure 1. The transcription factor Klu is specifically expressed in**  
847 **enteroblast cells. A-A'** The *klu-Gal4*, *UAS-GFP* reporter line shows  
848 expression in the midgut epithelium. ISCs (arrows) and EBs (arrowheads) are  
849 visualized by *esg-lacZ*. Cells are outlined with Armadillo/ $\beta$ -catenin. **B-C.** The  
850 *klu-Gal4*, *UAS-GFP* was combined with *Su(H)-GBE-lacZ* (enteroblast (EB)  
851 marker) or *DI-lacZ* (intestinal stem cell (ISC) marker). Expression of Klu  
852 largely overlaps with the EB marker *Su(H)-GBE-lacZ* (B), and Klu-positive  
853 cells are found adjacent to the Delta-positive ISC (C). **D-E.** Quantification of  
854 marker gene overlap of the genotypes displayed in (B-C)  $n = 7$  guts (*DI-lacZ*,  
855  $n = 1370$  cells counted) and  $n = 10$  guts (*Su(H)-GBE-lacZ*,  $n = 572$  cells  
856 counted). **F-H.** Lineage-tracing of cells in the intestine using different cell-  
857 specific drivers. **F-F'.** The *DI-Gal4*-positive ISCs give rise to both differentiated  
858 cell types of the intestinal lineage (enterocytes (EC) and entero-endocrine  
859 (EE) cells). EEs are marked by antibody staining for the transcription factor  
860 Prospero (Pros, in red). Arrows indicate GFP-Pros double-positive EEs in the  
861 clonal area, whereas arrowheads indicate EEs outside the clonal area. **G-G'.**  
862 *Su(H)-GBE*-positive EB cells exclusively give rise to ECs, but not to EEs  
863 (arrowheads). **H-H'.** Similar to *Su(H)-GBE*-positive EBs, Klu-positive cells also  
864 give rise exclusively to ECs, but not EEs.

865

866 **Figure 2. Loss of Klu leads to excess EE differentiation. A-E.** RNAi-  
867 mediated knockdown of Klu results in an excess of Pros-positive EE-cells.  
868 Expression of *klu<sup>RNAi</sup>* using either the EB-specific *Su(H)GBE-Gal4<sup>ts</sup>* driver  
869 (Pros in red, compare A with B) or the ISC+EB driver *esg-Gal4<sup>ts</sup>* (Pros in

870 green, compare C with D) results in more EE cells in the posterior midgut. **E.**  
 871 EE cell quantification of the posterior midgut for the genotypes in **A-D**. Error  
 872 bars represent mean  $\pm$  S.D. Significance was calculated using Student's t-  
 873 test with Welch's correction. Number of midguts  $n = 15$  (control  $w^{1118}$ ) and  $n =$   
 874  $18$  ( $klu^{RNAi}$ ) for experiments with the *Su(H)GBE-Gal4<sup>ts</sup>* driver and  $n = 12$   
 875 (control  $w^{1118}$ ) and  $n = 16$  ( $klu^{RNAi}$ ) for *esg-Gal4<sup>ts</sup>* **F-I**. Clonal analysis of the  
 876  $klu^{R51}$  null mutant allele using the MARCM technique.  $klu^{R51}$  mutant clones  
 877 have more EE cells compared to FRT2A control clones (compare F and G).  
 878 **H-I**. Quantification of the number of Pros-positive EEs/clone (H) and the total  
 879 number of Pros-positive EEs/ROI for the genotypes in **F-G**.  $n = 15$  guts  
 880 (FRT2A control) and  $n = 17$  guts ( $klu^{R51}$ ). Error bars represent mean  $\pm$  S.D.  
 881 Significance was calculated using Student's t-test with Welch's correction.

882

883 **Figure 3. Klu overactivation results in a loss of intestinal stem cell**  
 884 **differentiation and Delta-Notch signaling. A-D**. Clonal expression of  
 885 different Klu isoforms using the *esg-FlipOut* (*esg-F/O*) system to generate ISC  
 886 clones. **A**. Control *esg-FO* clones grow to occupy most of the posterior midgut  
 887 2 weeks after clonal induction. **B-D**. Clones expressing either full-length Klu  
 888 (*UAS-kluFL*, **B**) or the Klu zinc-finger DNA-binding domain fused to the  
 889 Engrailed repressor domain (*UAS-ERD-kluZF*, **D**) resulted in a block of  
 890 differentiation. This was not observed when expressing the Klu zinc-finger  
 891 DNA-binding domain fused to the VP16 transcriptional activator domain (*UAS-*  
 892 *VP16-kluZF*, **C**). **E**. Quantification of genotypes in **A-D**. Error bars represent  
 893 mean  $\pm$  S.D. Significance was calculated using Student's t-test with Welch's  
 894 correction.  $n = 5$  for each genotype. **F-I**. Klu expression in ISC clones leads to

895 a loss of Notch signaling activity in ISC-EB pairs. **F.** Control clones always  
896 contain 1 or more ISCs that are positive for the Notch ligand Delta (*DI-lacZ*,  
897 red). **G.** *DI-lacZ* staining is absent from clones expressing *UAS-kluFL*. **H.**  
898 Control clones have EB cells that are marked by presence of the Notch  
899 activity reporter *Su(H)-GBE-lacZ* (red). **I.** Notch transcriptional activity is  
900 absent from *UAS-kluFL*-expressing *esg-F/O* clones.

901

902 **Figure 4. Transcriptome profiling indicates that Klu acts to repress**

903 **Notch signaling output and genes critical to EE differentiation. A.**

904 Overview of the experiment: *esg<sup>ts</sup>* GFP<sup>+</sup> cells either expressing *klu<sup>RNAi</sup>* or  
905 *UAS-kluFL* were sorted in triplicate and their transcriptome was compared to  
906 control *esg<sup>ts</sup>* GFP cells (see Methods for more details). **B.** qRT-PCR analysis  
907 of sorted cells for Klu and the critical EE fate regulators Scute (*sc*) and  
908 Prospero (*pros*). **C.** qRT-PCR analysis of *klu* mRNA expression with a primer  
909 pair that targets the endogenous 3' UTR coding sequence (*klu UTR*) and a  
910 primer pair that targets the coding region only (*klu CDS*). **D.** Overlap of  
911 significantly upregulated genes in *klu<sup>RNAi</sup>* and significantly downregulated  
912 genes in *UAS-kluFL*. **E.** Volcano plots comparing expression of a selection of  
913 genes from the overlap of 81 genes shown in (D). Genes upregulated in the  
914 *klu<sup>RNAi</sup>* VS control set (left) are downregulated in the *UAS-klu* VS control set  
915 (right). **F-I.** Klu represses Da-dependent *miraP-GFP* expression in ISC and  
916 EB. Control *miraP-GFP* expression (F) is high in ISCs and EBs and slightly  
917 increased in *klu<sup>RNAi</sup>* midguts (G). *UAS-kluFL* expression in reduced levels of  
918 *miraP-GFP* (H). **I.** GFP-intensity of *miraP-GFP*-positive cells for the  
919 genotypes in (F-H) by FACS. *n* = 50 midguts per genotype.

920

921 **Figure 5. Scute acts downstream of Klu in the induction of entero-**  
 922 **endocrine differentiation. A-D.** Expression of *klu*<sup>RNAi</sup> lead to increased EE  
 923 differentiation in clones 14 days after clonal induction, marked by increased  
 924 numbers of Pros<sup>+</sup>-cells (red) (A-B, quantification in E-F). *sc*<sup>RNAi</sup> clones  
 925 showed almost no EE differentiation (C). Similarly, the combination of *klu*<sup>RNAi</sup>  
 926 with *sc*<sup>RNAi</sup> resulted in clones lacking EE differentiation (D). **E** Quantification of  
 927 GFP<sup>+</sup>/Pros<sup>+</sup> double-positive cells/clone of the genotypes in (A-D). **F.**  
 928 Quantification of GFP<sup>+</sup>/Pros<sup>+</sup> double-positive cells/clone of *esg-F/O* clones  
 929 expressing either *UAS-sc*, *UAS-klu* or the combination. See Figure S6 for  
 930 images. Error bars represent mean +/- S.D. Significance was calculated using  
 931 Student's t-test with Welch's correction. For E: *n* = 10 for control and *sc*<sup>RNAi</sup>, *n*  
 932 = 14 for *klu*<sup>RNAi</sup>, and *n*=12 for *sc*<sup>RNAi</sup>; *klu*<sup>RNAi</sup>. For F: *n* = 5 for control, *n* = 6 for  
 933 *UAS-klu*, *UAS-sc* and *UAS-klu*; *UAS-sc*.

934

935 **Figure 6. Klu directly represses genes involved in Notch signaling, cell**  
 936 **cycle and EE differentiation. A-E.** Klu-Dam binding tracks (in triplicate) for  
 937 the *klu* locus (A), *sina* locus (B), *Cyclin E* (C) and *Cyclin B* (D) as well as the  
 938 E(Spl)-complex genes *E(Spl)-mδ* and *E(Spl)-mγ* (E). Tracks are displayed  
 939 using Integrated Genome Viewer (IGV) as overlaid tracks of the triplicate  
 940 Klu-Dam VS Dam-only control comparisons. Arrows indicate direction of  
 941 transcription. Numbers indicate the average maximum height of the peak  
 942 (log<sub>2</sub>FC of Klu-Dam over Dam-only control) for each of the 3 replicates. **F.**  
 943 Model of Klu function in lineage differentiation in the intestine. Klu expression  
 944 is activated by Delta-Notch signaling in the EB cell, together with other

945 members of the Hairy/Enhancer of Split family of Notch target genes. Klu  
 946 accumulation in EBs results in a subsequent repression of these target genes,  
 947 including the repression of its own expression. Additionally, Klu acts as a  
 948 safeguard to repress erroneous EE differentiation in the enteroblast-  
 949 enterocyte lineage by indirectly repressing the accumulation of proneural  
 950 genes such as Asense and Scute through inhibition of the E3-complex  
 951 members Phyllopod (*phyl*) and Seven-in Absentia (*sina*) that repress the  
 952 accumulation of Scute and thereby inhibit EE fate. Finally, Klu acts in the  
 953 regulation of the cell cycle in EB cells, as the cell remodels its cell cycle from  
 954 a mitotic to an endocycle.



**Figure 1** Korzelius et al.

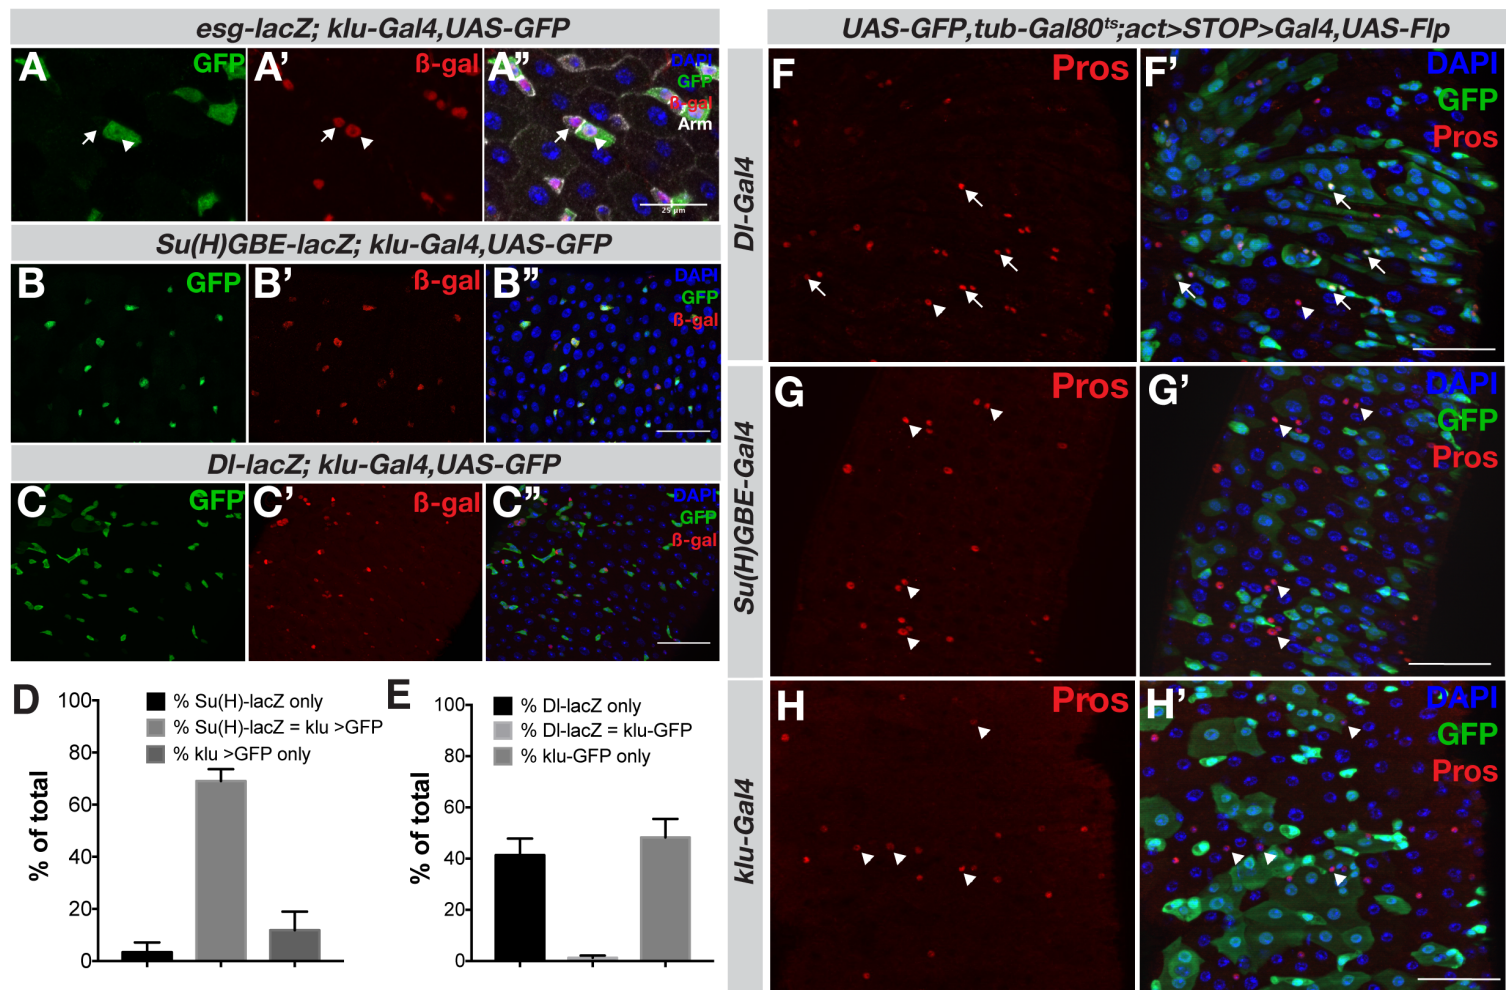

# Figure 2 Korzelius et al.

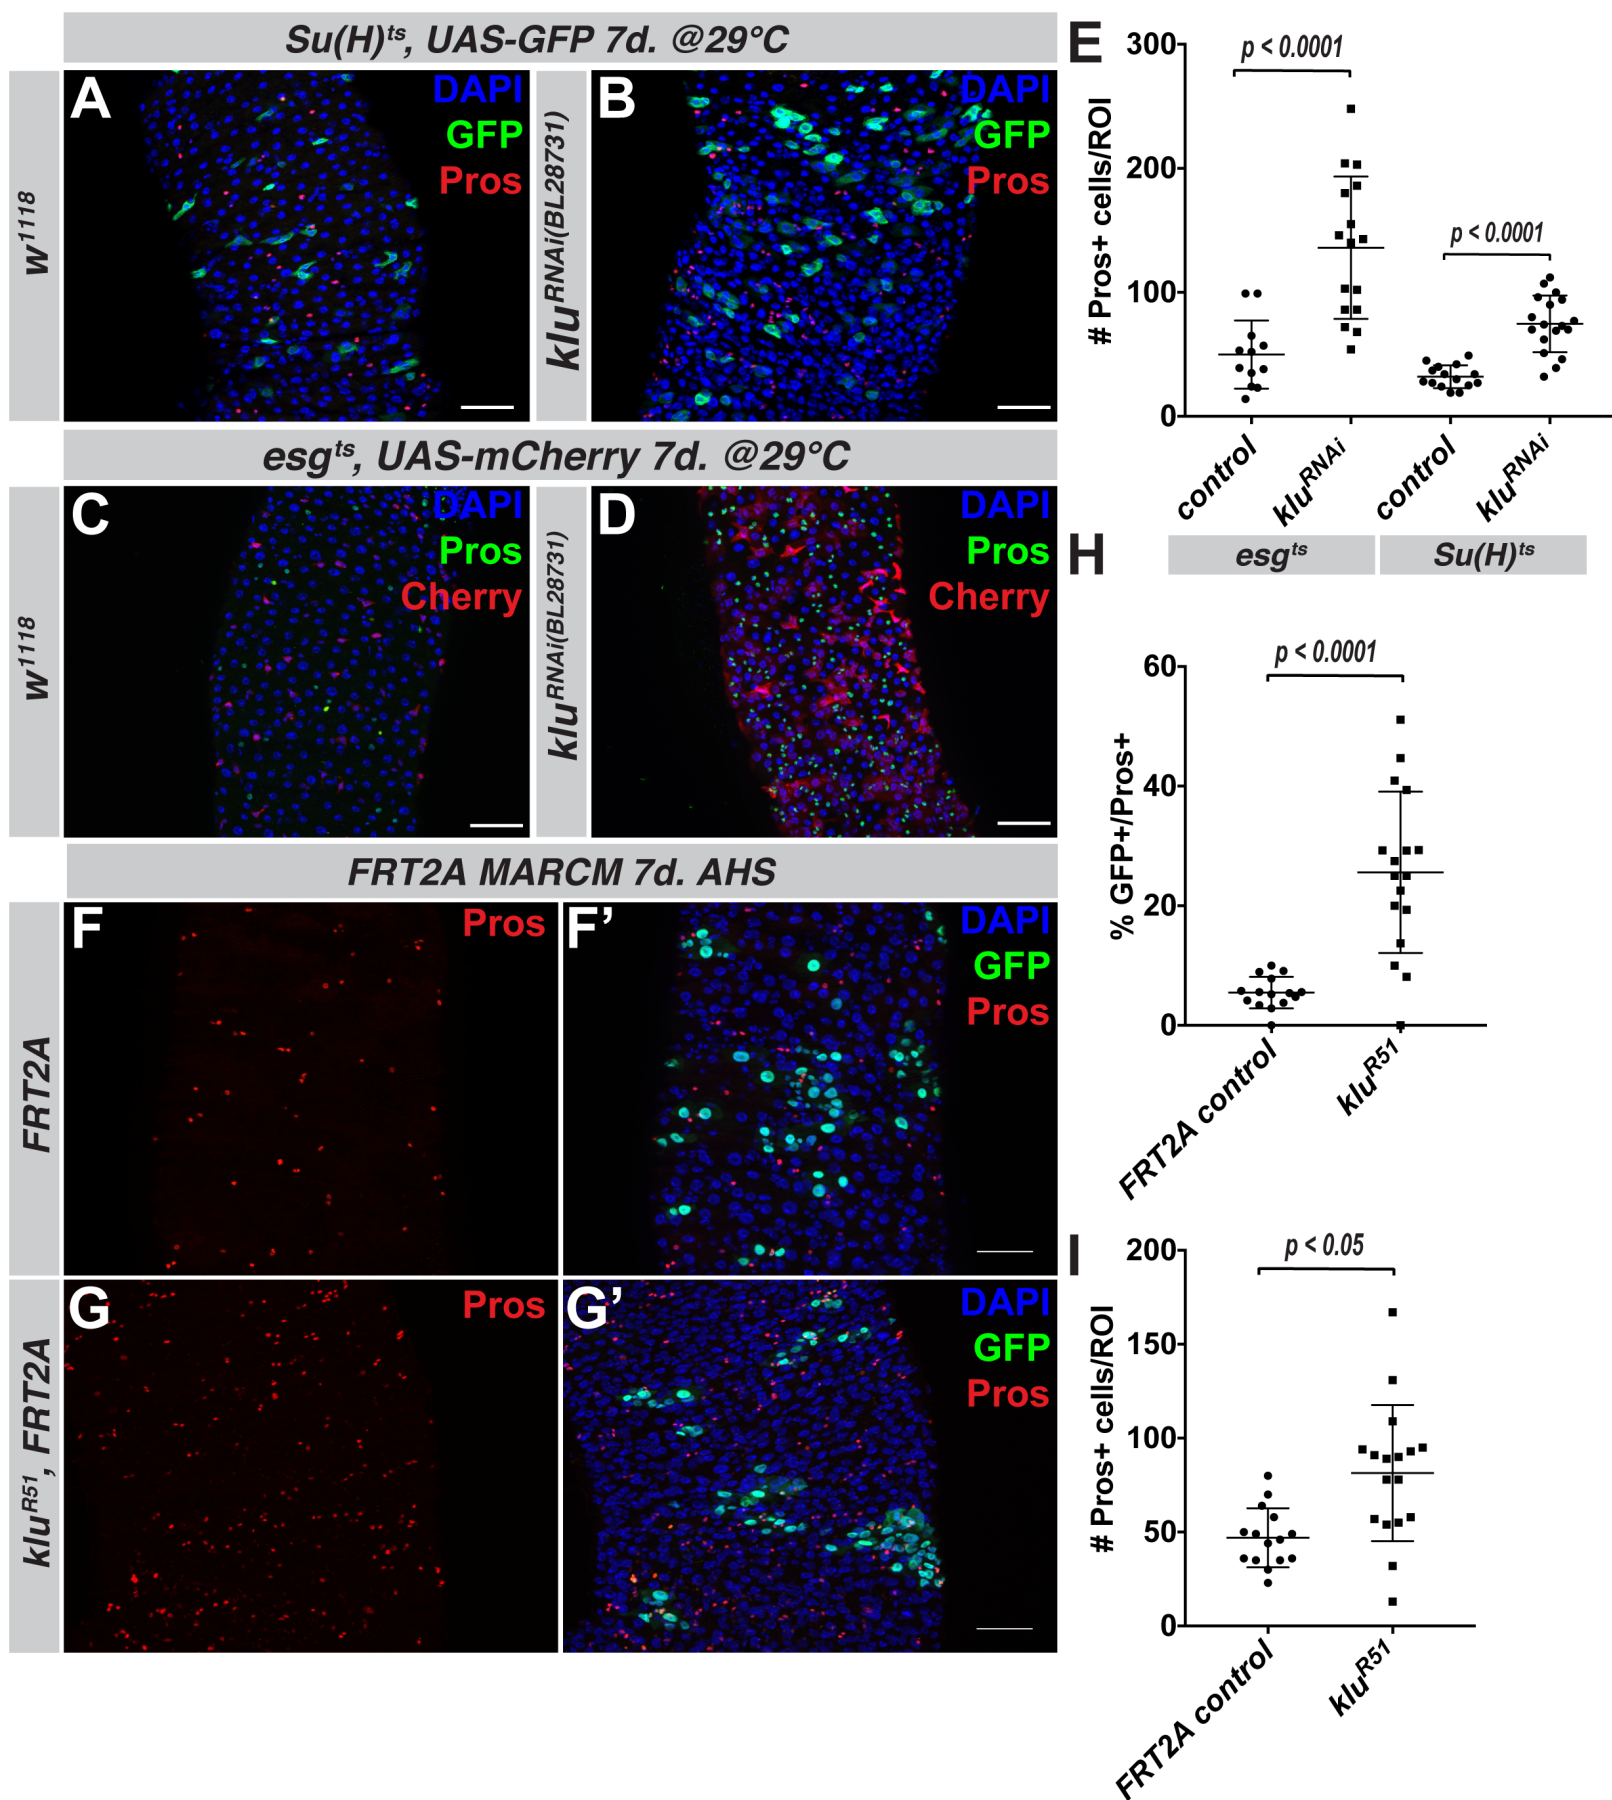



Figure 3 Korzelius et al.

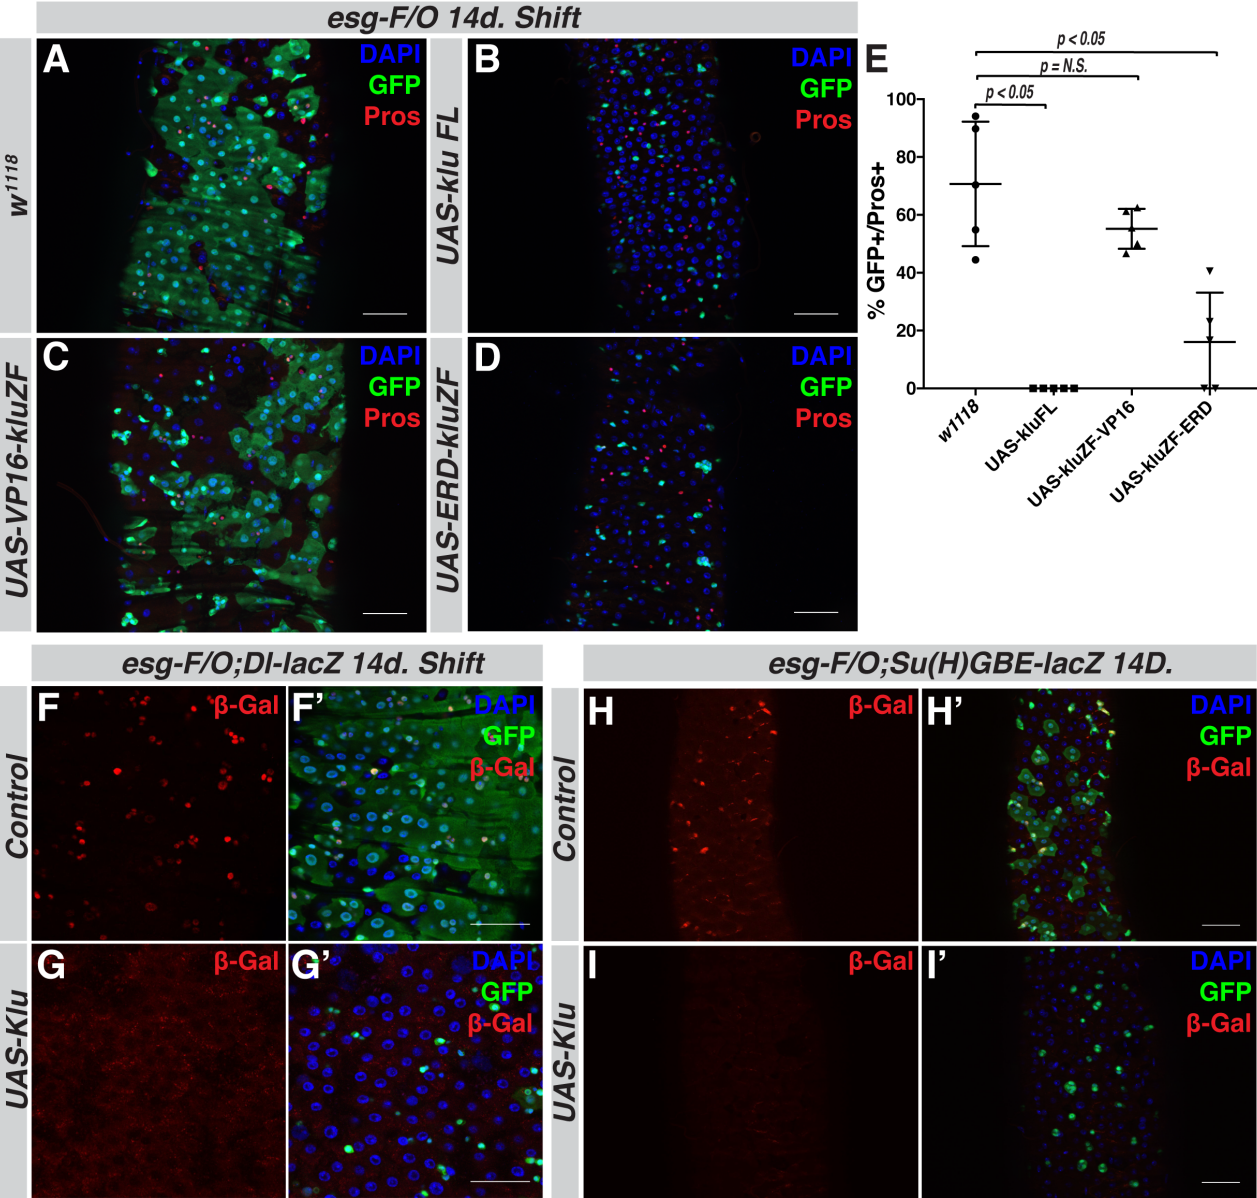

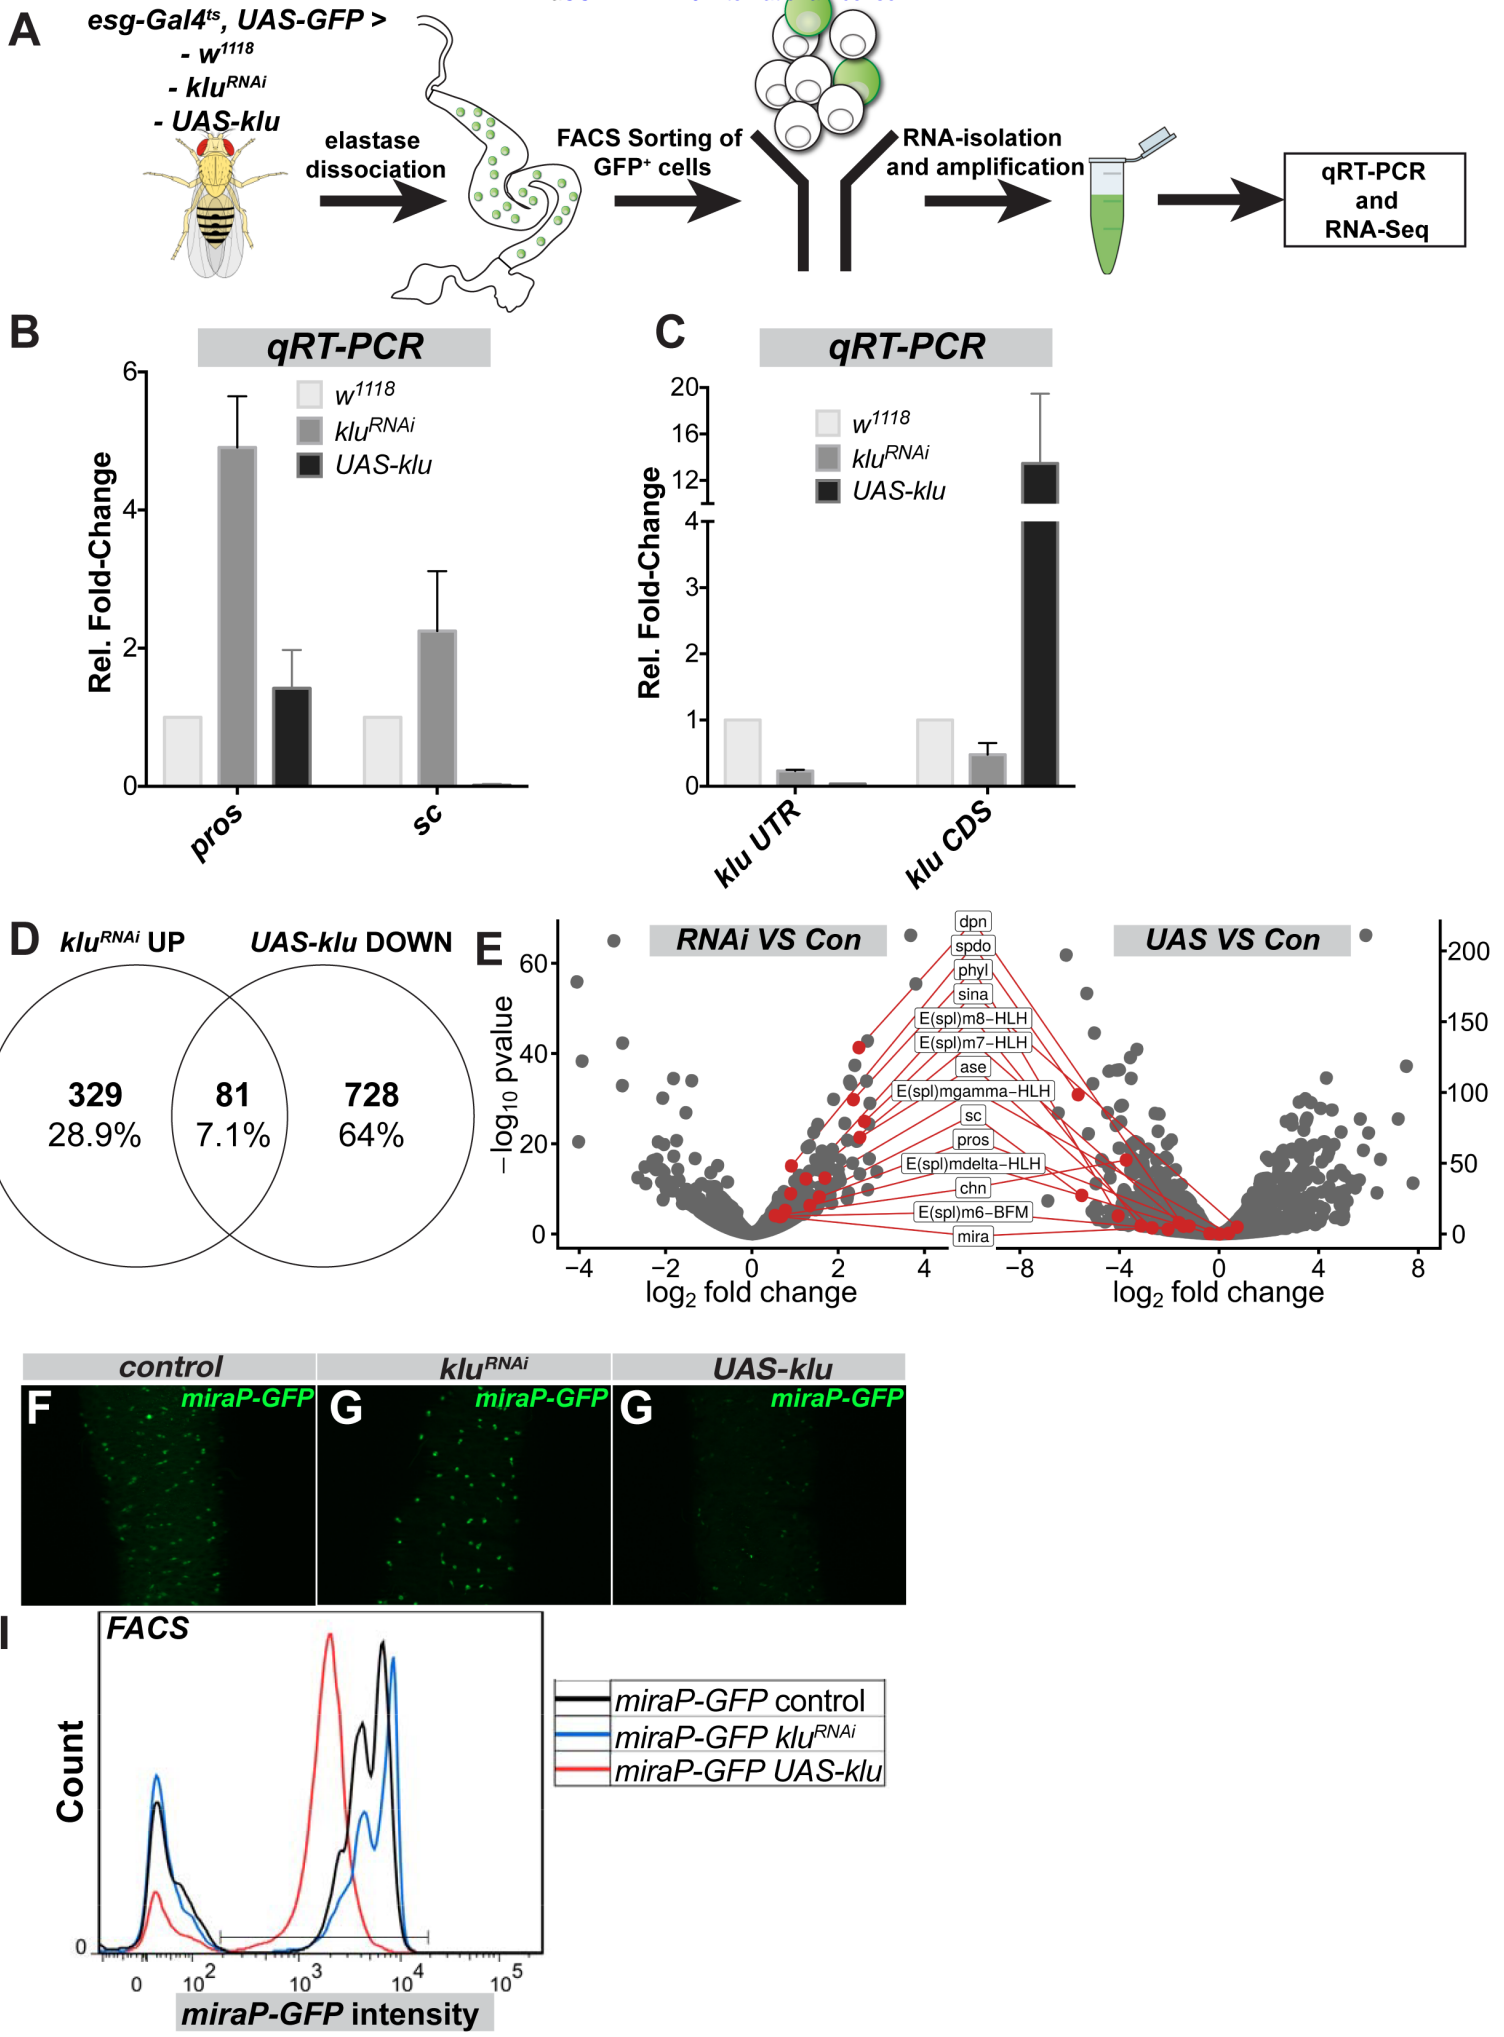

Figure 5 Korzelius et al.

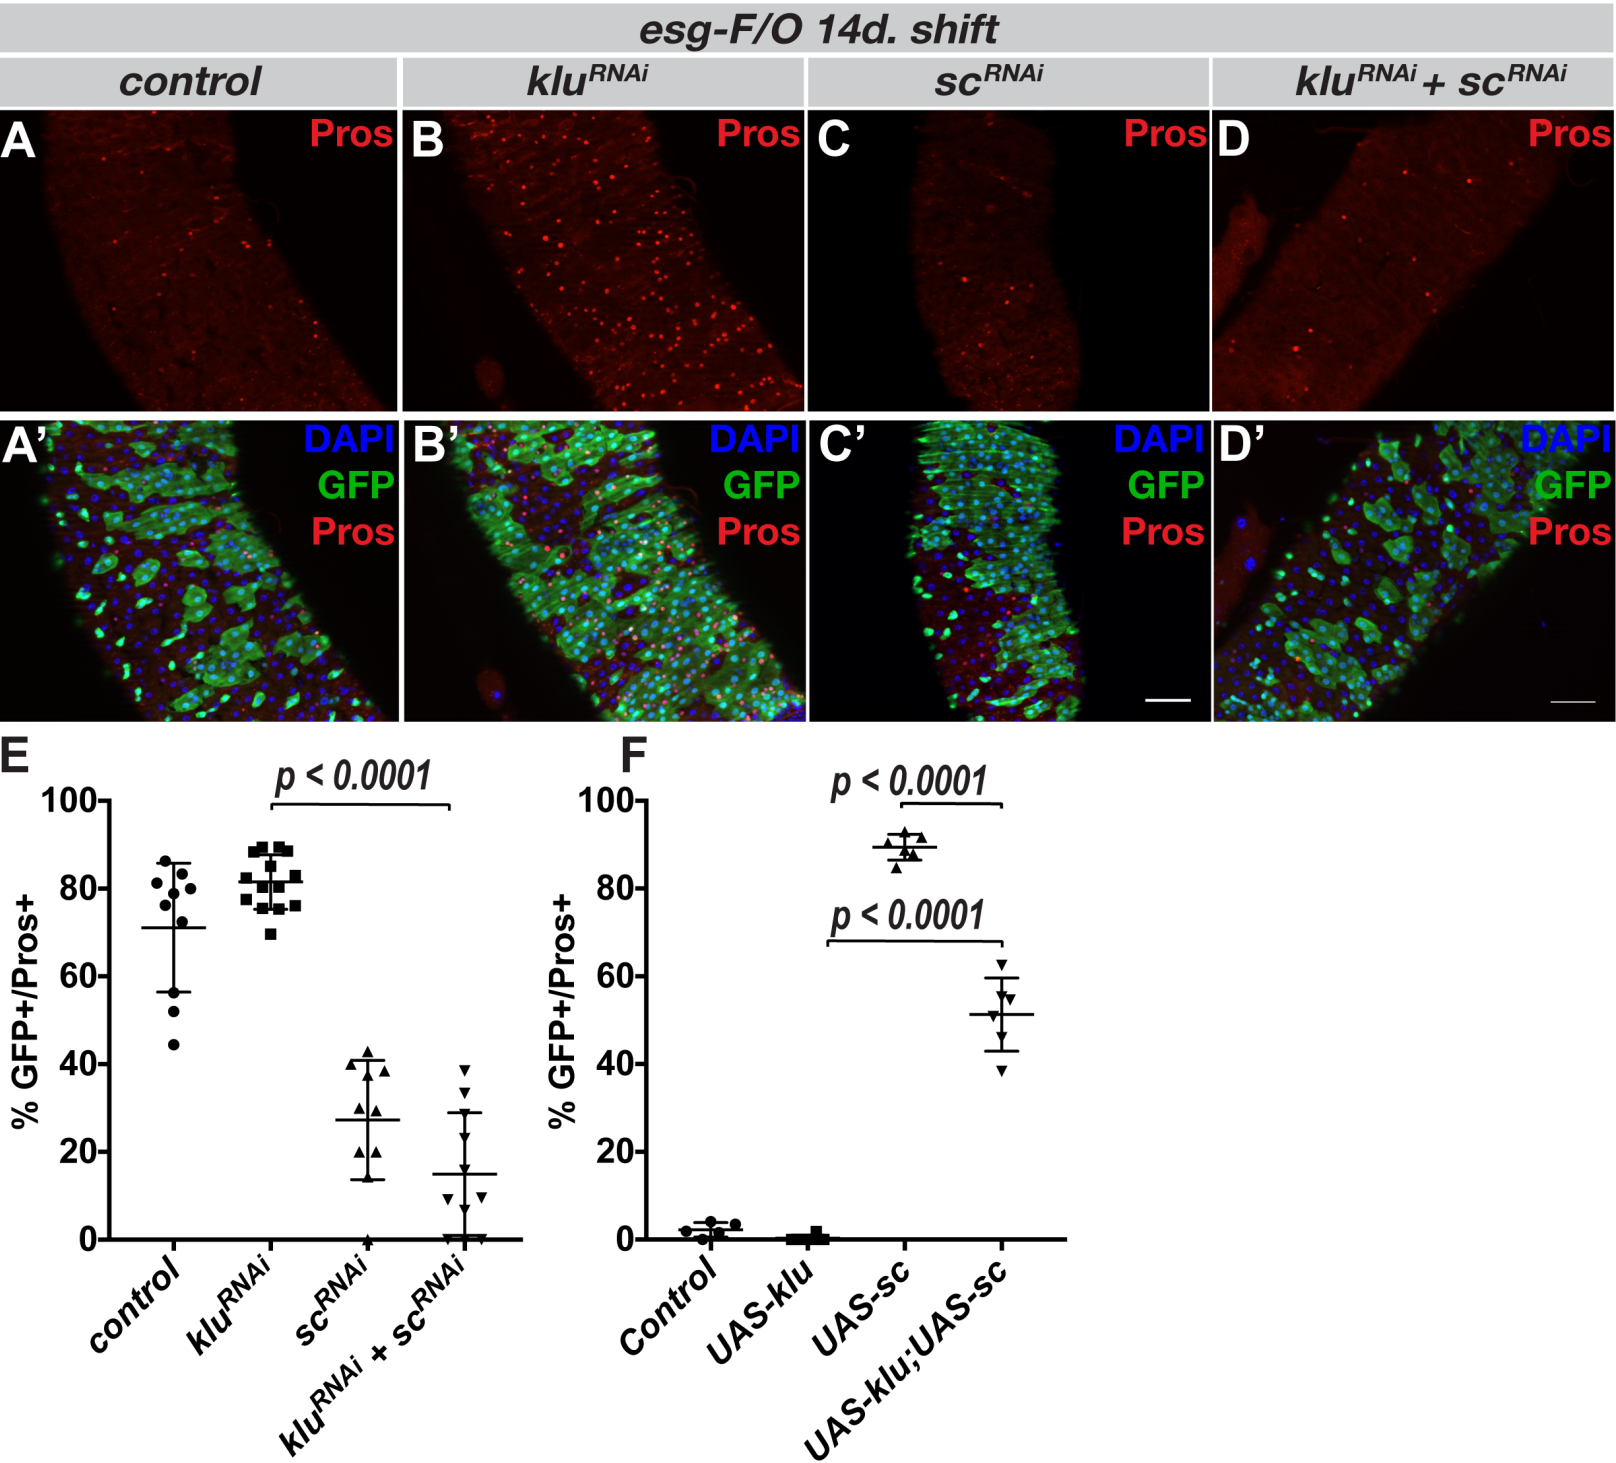

**Figure 6 Korzelius et al.**

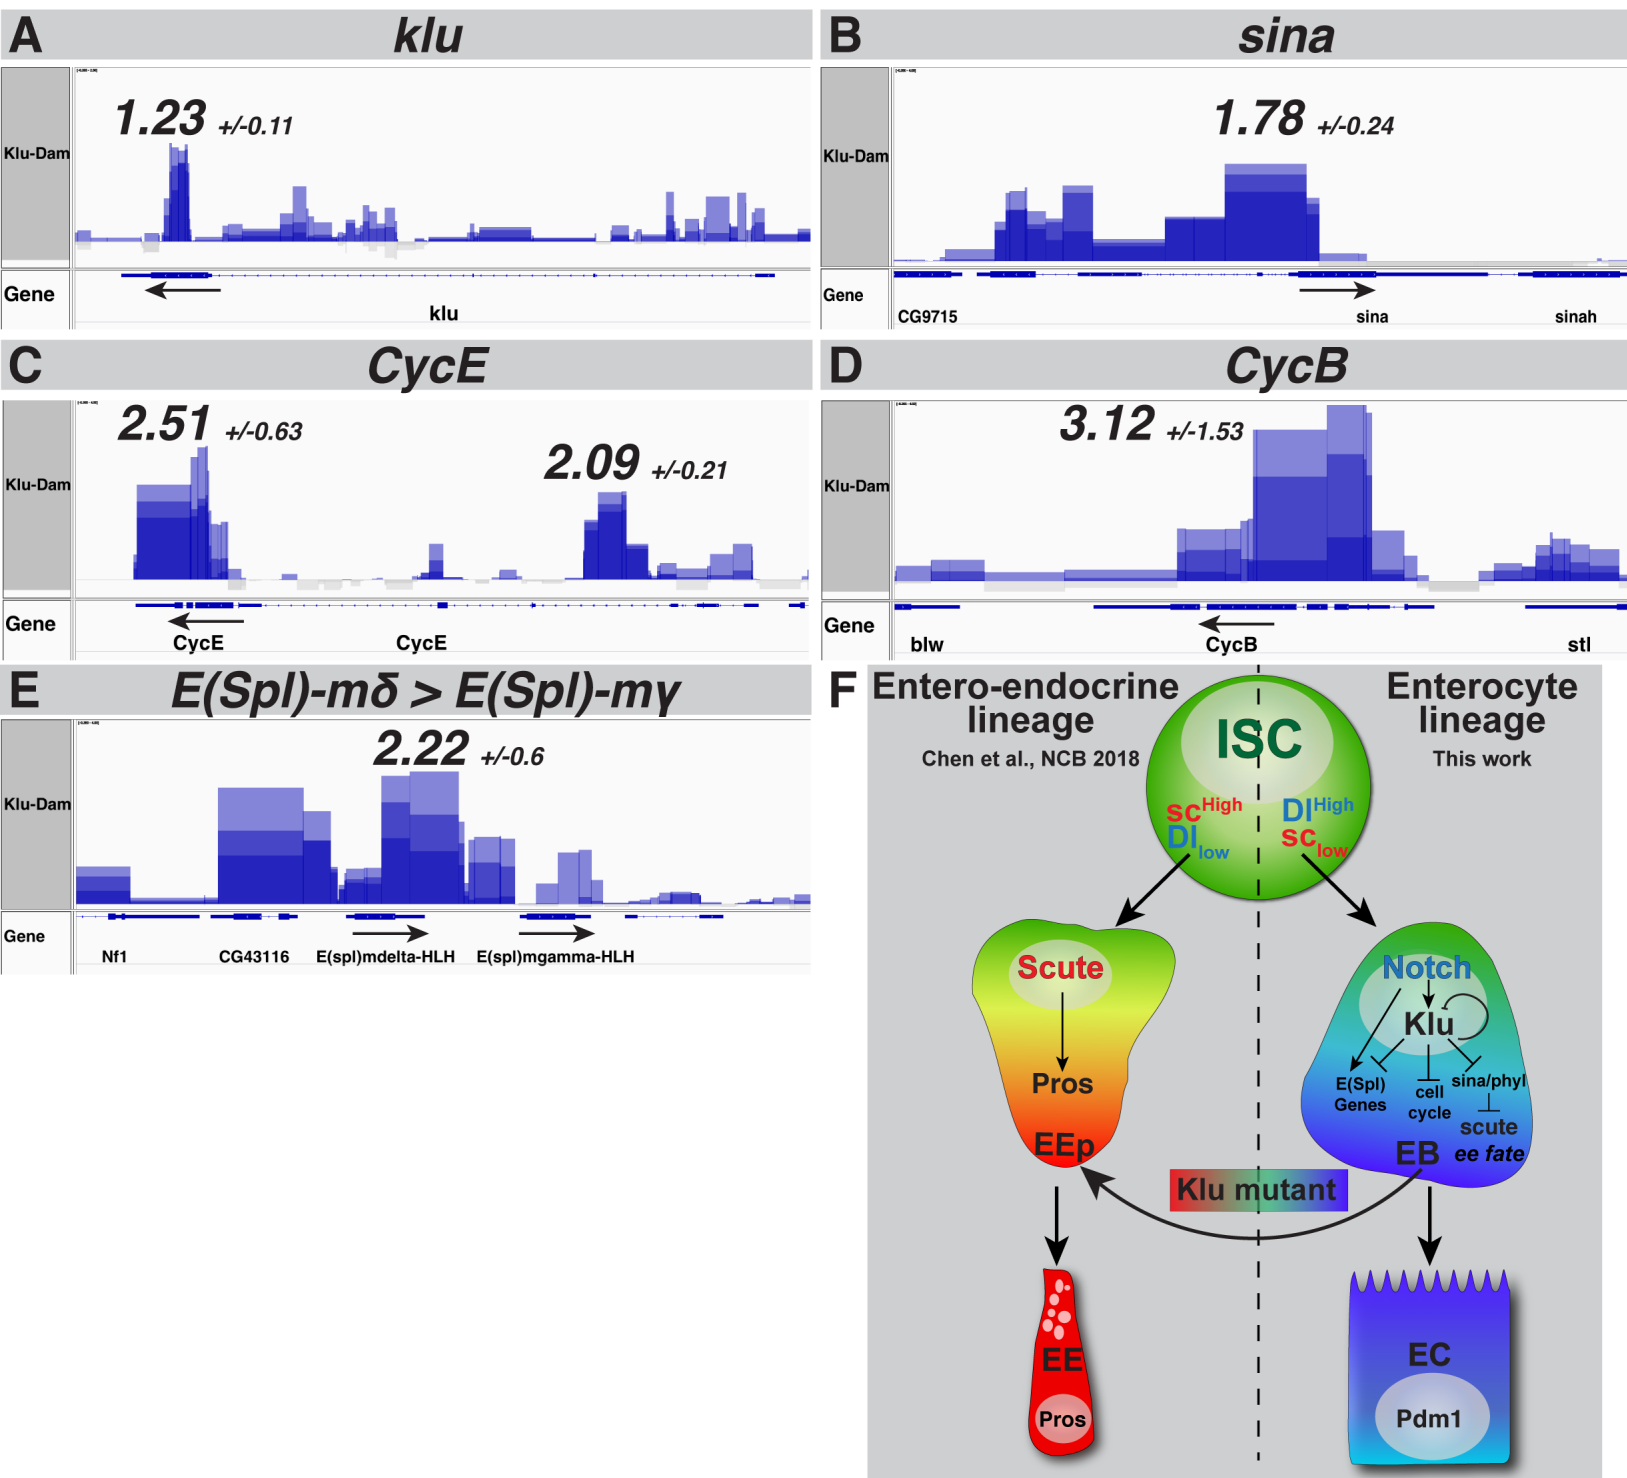

Source: https://www.biorxiv.org/content/10.1101/590885v1.full.pdf
